# Supplementary material for: Tetrastigma hemsleyanumleaf extracts ameliorate NAFLD in mice with low-grade colitisviathe gut–liver axis
Source: Royal Society of Chemistry journal article supplement (doi:10.1039/d2fo03028d), 2022-12-15

## Supplementary materials

### Figure S1

The food intake of mice during the experiment. Record food intake twice a week.

### Figure S2

Body weight, liver weight, fat weight, and glucose tolerance among NC, HFD, HFD+DSS, L-THL, and H-THL groups. (A) Body weight (B) Body weight increment (C) Liver weight (D) Fat weight (E) Blood glucose (F) Summed OGTT AUC

### Figure S3

Comparison of lipid accumulation in liver and hepatic damage among NC, HFD, HFD+DSS, L-THL, and H-THL groups. (A) Oil Red O staining of liver sections at 200 times. (scale bar=100µm). (B) AST in serum. (C, D) LDL-c, HDL-c in serum. (E, F) TC, TG in the liver.

### Figure S4

Comparison of colon injury among NC, HFD, HFD+DSS, L-THL, and H-THL groups. (A, B) The length of the colon. (C) H&E staining of colon sections at 100 times (scale bars=100µm). (E) Fluorescence image of Mucin2 at 200 times (scale bars=100µm) and 400 times (scale bars=50µm), the target protein was expressed as green fluorescence. (F) Fluorescence image of ZO-1 at 200 times (scale bars=100µm) and 400 times (scale bars=50µm), the target protein was expressed as green fluorescence.

Table S1. Information about the diet of mice

|              | Normal diet       | Main source | High-fat diet     | Main source          |
|--------------|-------------------|-------------|-------------------|----------------------|
| Contents     | Energy(kcal/100g) |             | Energy(kcal/100g) |                      |
| Fat          | 36.4              | Soybean oil | 187.8             | Lard, Soybean oil    |
| Protein      | 77.1              | Fish meal   | 67.2              | Fish meal            |
| Carbohydrate | 211.3             | Corn, wheat | 213.6             | Corn, wheat, sucrose |

Figure S1

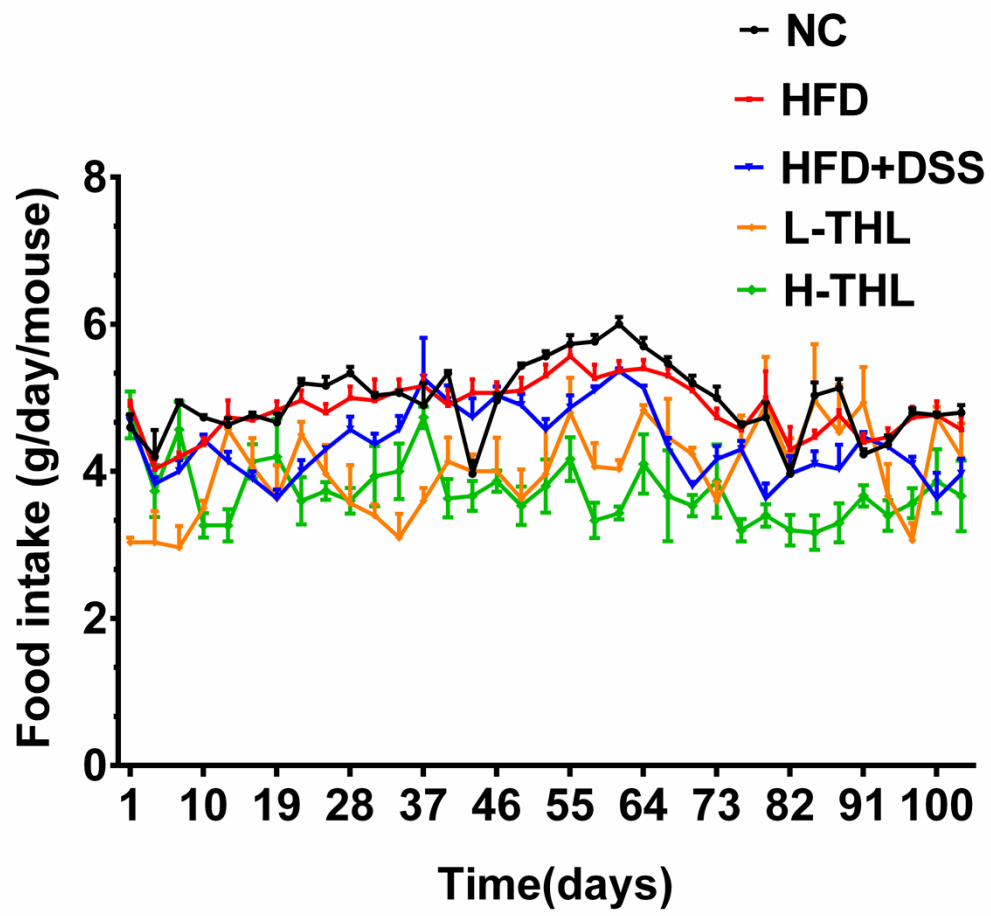

Figure S2

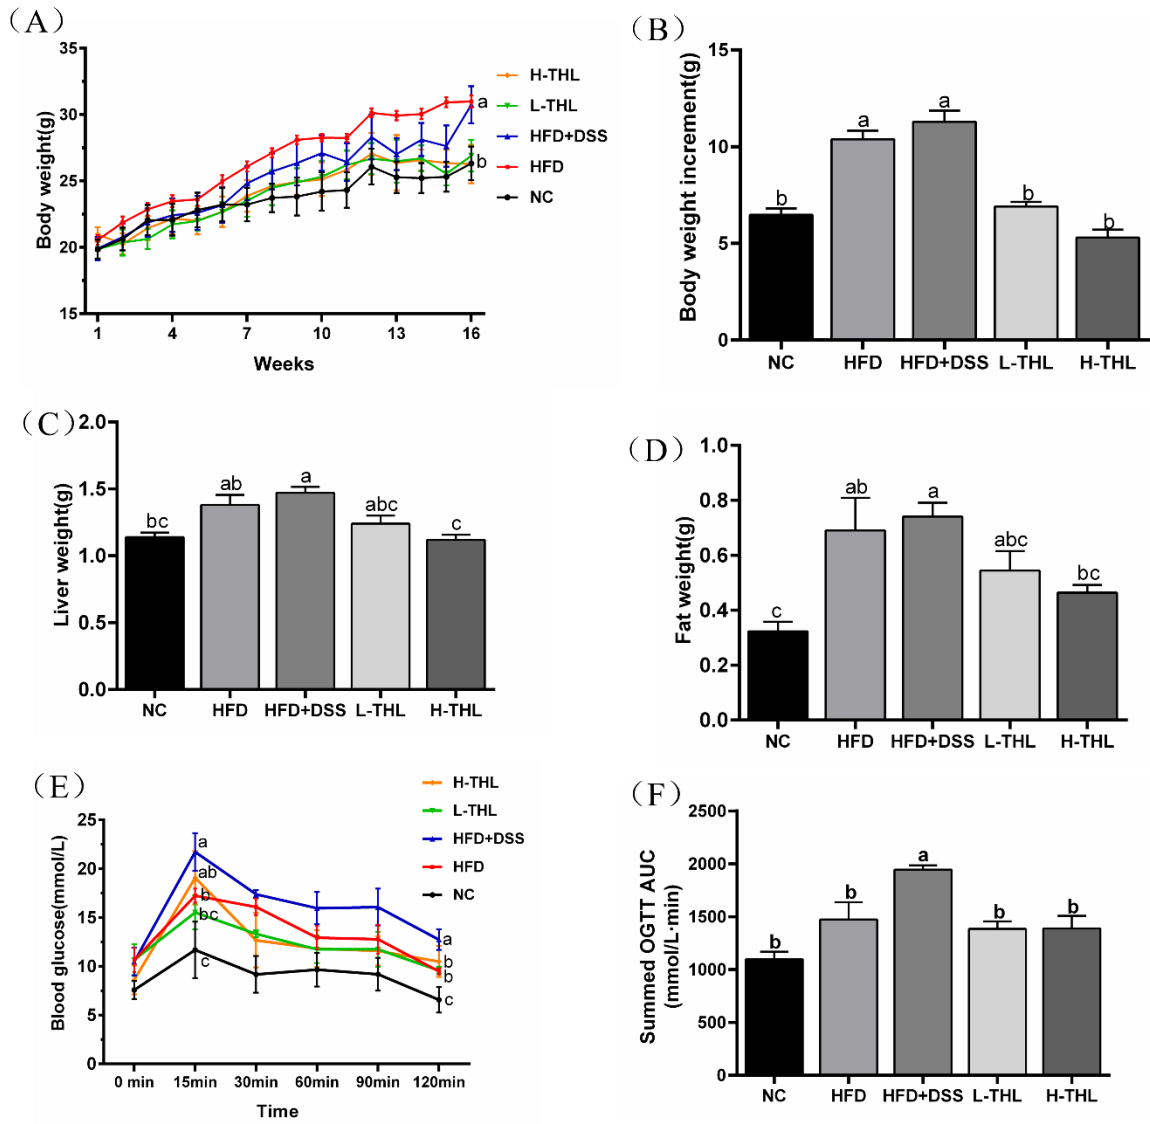

(A)

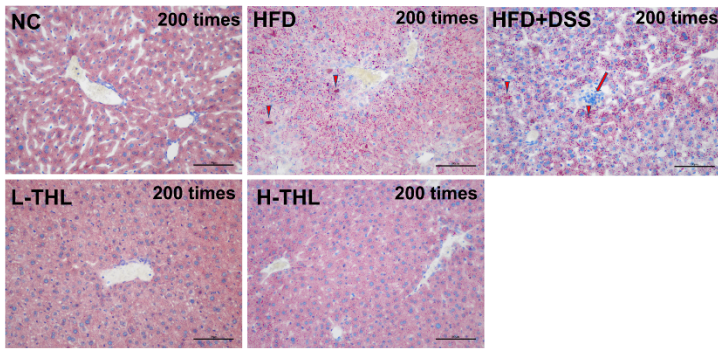

(B)

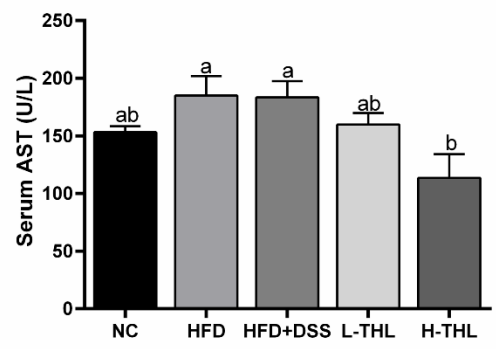

(C)

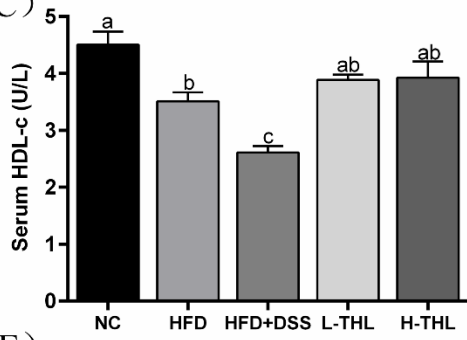

(D)

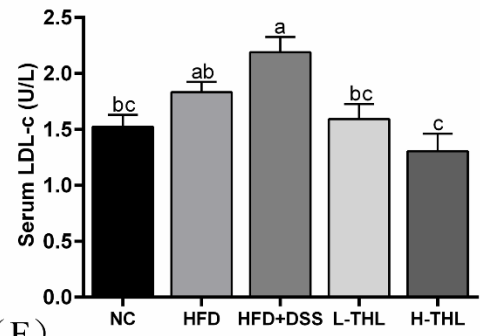

(E)

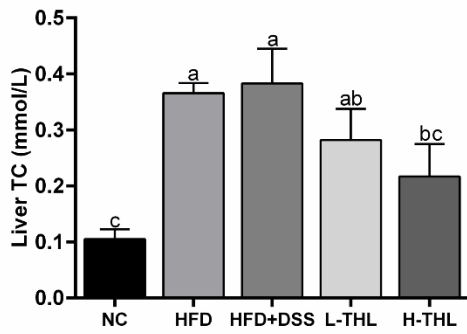

(F)

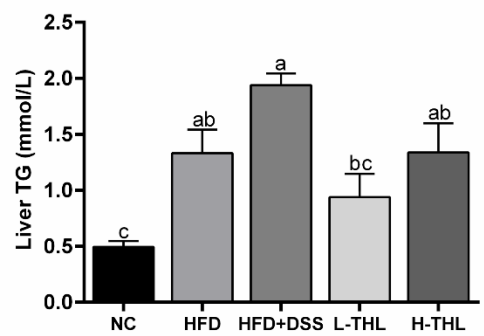

Figure S3

Figure S 4

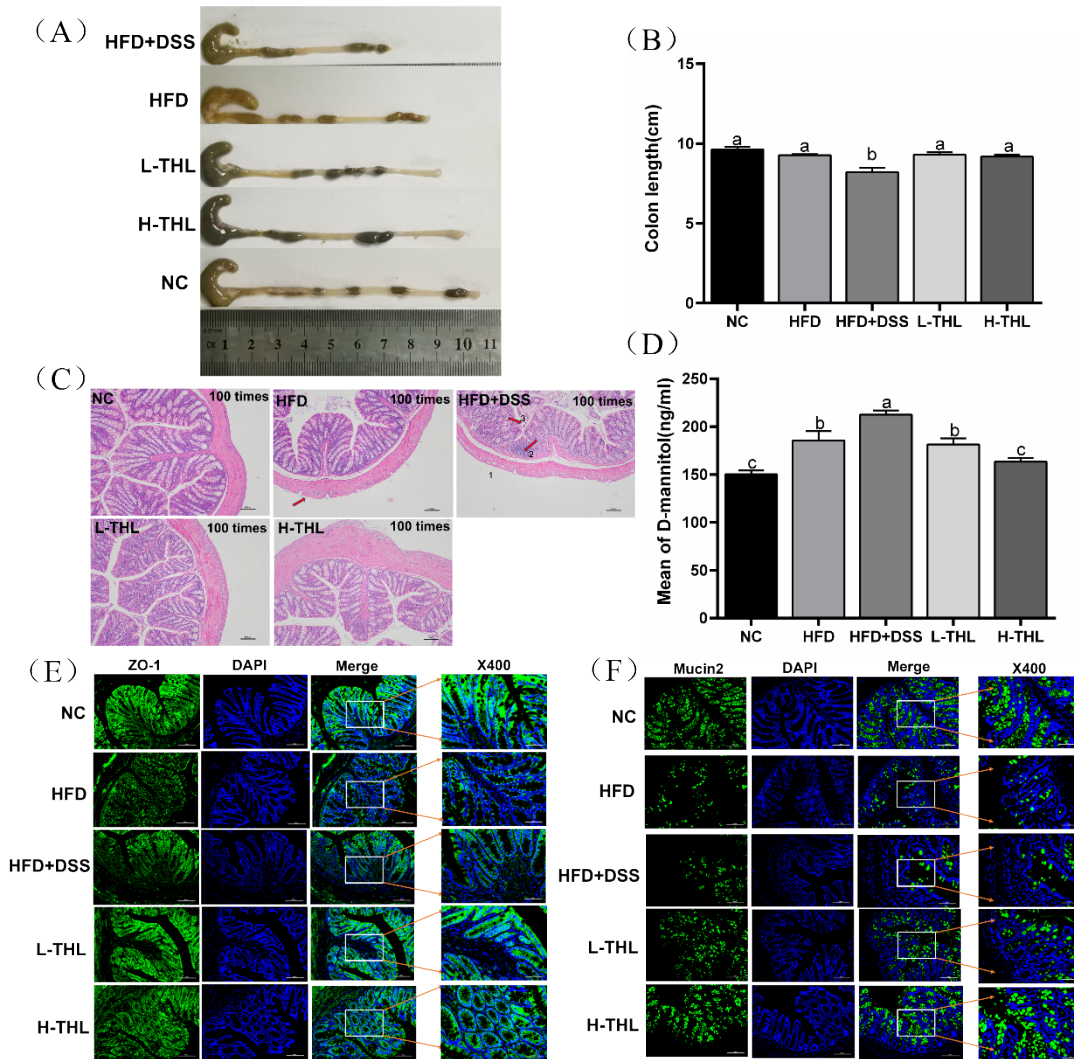

Supplement: d2fo03028d2.pdf [file d2fo03028d2.pdf]
