# Supplementary material for: Tetrastigma hemsleyanumleaf extracts ameliorate NAFLD in mice with low-grade colitisviathe gut–liver axis
Source: Royal Society of Chemistry journal article supplement (doi:10.1039/d2fo03028d), 2022-12-15
Supplement: d2fo03028d1.pdf [file d2fo03028d1.pdf]

| Raw Data                  |        |         |        |        |  |                          |        |         |        |        |
|---------------------------|--------|---------|--------|--------|--|--------------------------|--------|---------|--------|--------|
| Groups                    | NC     | HFD+DSS | L-THL  | H-THL  |  | Groups                   | NC     | HFD+DSS | L-THL  | H-THL  |
| Mean of D-mannitol(ng/ml) | 130.97 | 227.52  | 184.53 | 156.50 |  | Body wieght increment(g) | 6.40   | 12.30   | 6.10   | 5.60   |
|                           | 158.36 | 212.57  | 164.91 | 174.25 |  |                          | 4.70   | 13.80   | 8.70   | 4.40   |
|                           | 154.63 | 203.69  | 195.75 | 171.92 |  |                          | 7.70   | 13.10   | 6.00   | 6.70   |
|                           | 147.64 | 204.61  | 180.33 | 157.90 |  |                          | 5.60   | 12.70   | 6.60   | 3.50   |
|                           | 150.35 | 223.60  | 170.23 | 156.03 |  |                          | 7.50   | 10.00   | 6.40   | 5.30   |
|                           | 151.90 | 202.29  | 178.42 | 163.35 |  |                          | 5.30   | 8.50    | 6.80   | 6.00   |
|                           |        |         |        |        |  |                          | 7.00   | 11.90   | 6.70   | 3.50   |
|                           |        |         |        |        |  |                          | 8.00   | 13.40   | 6.90   | 3.70   |
|                           |        |         |        |        |  |                          | 6.30   | 9.30    | 7.60   | 6.00   |
|                           |        |         |        |        |  |                          | 7.40   | 9.10    | 7.60   | 7.50   |
|                           |        |         |        |        |  |                          | 5.30   | 10.00   | 6.60   | 6.10   |
|                           |        |         |        |        |  |                          |        |         |        |        |
| Groups                    | NC     | HFD+DSS | L-THL  | H-THL  |  | Groups                   | NC     | HFD+DSS | L-THL  | H-THL  |
| serum TNF-a(pg/ml)        | 66.26  | 287.69  | 80.55  | 204.83 |  | serum IL-6(pg/ml)        | 29.40  | 76.39   | 35.04  | 25.64  |
|                           | 64.83  | 248.40  | 141.26 | 147.69 |  |                          | 24.68  | 32.78   | 33.16  | 24.89  |
|                           | 105.55 | 284.12  | 199.83 | 141.98 |  |                          | 23.76  | 49.32   | 30.90  | 30.53  |
|                           | 76.83  | 221.98  | 94.12  | 212.12 |  |                          | 26.77  | 52.33   | 24.14  | 34.66  |
|                           | 100.35 | 196.98  | 96.98  | 136.12 |  |                          | 23.38  | 46.69   | 18.12  | 32.78  |
|                           | 83.17  | 303.56  | 126.13 | 165.28 |  |                          | 24.89  | 50.37   | 18.12  | 30.17  |
|                           |        |         |        |        |  |                          |        |         |        |        |
| Groups                    | NC     | HFD+DSS | L-THL  | H-THL  |  | Groups                   | NC     | HFD+DSS | L-THL  | H-THL  |
| serum IL-1b(pg/ml)        | 54.03  | 80.42   | 48.19  | 64.44  |  | Liver TNF-a(pg/ml)       | 609.15 | 753.30  | 852.40 | 730.77 |
|                           | 60.28  | 75.42   | 51.94  | 65.83  |  |                          | 582.13 | 1111.41 | 751.05 | 489.13 |
|                           | 58.19  | 59.58   | 52.64  | 63.06  |  |                          | 589.78 | 995.19  | 645.19 | 778.33 |
|                           | 65.14  | 60.97   | 53.33  | 63.75  |  |                          | 521.38 | 811.86  | 521.32 | 271.32 |

|                                |        |         |        |        |  |                                 |        |         |         |        |
|--------------------------------|--------|---------|--------|--------|--|---------------------------------|--------|---------|---------|--------|
|                                | 55.33  | 63.06   | 52.64  | 65.83  |  |                                 | 582.13 | 1023.57 | 693.28  | 255.55 |
|                                | 58.32  | 67.91   | 51.29  | 64.44  |  |                                 | 302.85 | 934.31  | 737.35  | 372.67 |
| Groups<br>liver<br>IL-6(pg/ml) | NC     | HFD+DSS | L-THL  | H-THL  |  | Groups<br>liver<br>IL-1b(pg/ml) | NC     | HFD+DSS | L-THL   | H-THL  |
|                                | 137.96 | 312.72  | 133.50 | 138.18 |  |                                 | 473.05 | 1440.42 | 1031.21 | 697.26 |
|                                | 101.83 | 250.58  | 231.62 | 194.76 |  |                                 | 443.58 | 1343.58 | 1121.47 | 363.05 |
|                                | 150.58 | 259.32  | 193.30 | 101.49 |  |                                 | 783.58 | 1001.47 | 1339.37 | 963.58 |
|                                | 50.58  | 210.78  | 164.66 | 171.46 |  |                                 | 671.10 | 1053.05 | 701.47  | 637.26 |
|                                | 88.45  | 236.99  | 151.07 | 112.23 |  |                                 | 861.47 | 1297.26 | 1141.47 | 387.79 |
|                                | 85.05  | 253.17  | 172.43 | 109.81 |  |                                 | 799.37 | 1224.31 | 866.74  | 611.24 |
| Groups<br>colon length(cm)     | NC     | HFD+DSS | L-THL  | H-THL  |  | Groups<br>Serum AST (U/L)       | NC     | HFD+DSS | L-THL   | H-THL  |
|                                | 10.10  | 8.35    | 9.65   | 9.50   |  |                                 | 153.60 | 146.40  | 149.60  | 95.20  |
|                                | 9.80   | 7.25    | 9.30   | 9.25   |  |                                 | 168.00 | 155.40  | 169.80  | 93.00  |
|                                | 9.75   | 8.95    | 9.00   | 9.00   |  |                                 | 139.80 | 233.20  | 161.60  | 128.00 |
|                                | 9.80   | 7.75    | 9.30   | 9.00   |  |                                 | 153.60 | 201.20  | 129.50  | 134.00 |
|                                | 9.35   | 8.80    | 9.75   | 8.95   |  |                                 | 165.40 | 193.40  | 175.40  | 144.20 |
|                                | 10.15  | 8.90    | 8.95   | 9.35   |  |                                 | 157.10 | 186.20  | 157.30  | 117.90 |
|                                | 9.90   | 7.45    | 9.57   | 9.32   |  |                                 |        |         |         |        |
| Groups<br>Serum TG (mmol/L)    | NC     | HFD+DSS | L-THL  | H-THL  |  | Groups<br>Serum TC (mmol/L)     | NC     | HFD+DSS | L-THL   | H-THL  |
|                                | 1.22   | 1.12    | 0.62   | 0.94   |  |                                 | 4.02   | 5.92    | 5.76    | 5.64   |
|                                | 0.94   | 1.02    | 0.72   | 0.76   |  |                                 | 3.30   | 5.58    | 5.96    | 4.52   |
|                                | 1.2    | 1.28    | 0.78   | 0.86   |  |                                 | 4.10   | 6.94    | 5.62    | 3.91   |
|                                | 1.32   | 1.04    | 0.9    | 0.52   |  |                                 | 3.60   | 5.74    | 6.05    | 4.24   |
|                                | 1.15   | 1.68    | 0.56   | 0.73   |  |                                 | 3.50   | 6.04    | 3.12    | 1.72   |
|                                | 1.19   | 1.58    | 0.98   | 0.68   |  |                                 | 3.08   | 7.56    | 4.20    | 2.82   |

| Groups             | NC     | HFD+DSS | L-THL  | H-THL  | Groups             | NC    | HFD+DSS | L-THL | H-THL |
|--------------------|--------|---------|--------|--------|--------------------|-------|---------|-------|-------|
| Serum TBA (umol/L) |        |         |        |        | Serum MCP-1(pg/mL) |       |         |       |       |
|                    | 87.40  | 108.2   | 14.00  | 75.6   |                    | 63.50 | 130.34  | 81.83 | 60.17 |
|                    | 94.20  | 118.2   | 12.60  | 93.8   |                    | 50.17 | 146.30  | 85.17 | 58.50 |
|                    | 85.20  | 113.4   | 75.60  | 86     |                    | 56.83 | 122.04  | 75.17 | 66.83 |
|                    | 64.20  | 128.8   | 93.80  | 91.68  |                    | 85.02 | 136.72  | 45.17 | 67.15 |
|                    | 76.20  | 126.8   | 97.80  | 97.8   |                    | 74.17 | 132.89  | 83.11 | 69.70 |
|                    | 82.10  | 118.08  | 58.53  | 104.7  |                    | 68.43 | 91.40   | 74.13 | 76.72 |
|                    |        |         |        |        |                    |       |         |       |       |
|                    |        |         |        |        |                    |       |         |       |       |
| Groups             | NC     | HFD+DSS | L-THL  | H-THL  | Groups             | NC    | HFD+DSS | L-THL | H-THL |
| Liver TG (mmol/L)  |        |         |        |        | Liver TC(mmol/L)   |       |         |       |       |
|                    | 0.60   | 2.13    | 1.48   | 1.37   |                    | 0.18  | 0.31    | 0.20  | 0.22  |
|                    | 0.46   | 2.04    | 0.44   | 2.41   |                    | 0.08  | 0.28    | 0.39  | 0.37  |
|                    | 0.43   | 1.91    | 1.19   | 1.77   |                    | 0.07  | 0.49    | 0.35  | 0.21  |
|                    | 0.70   | 1.77    | 1.15   | 0.74   |                    | 0.08  | 0.39    | 0.24  | 0.38  |
|                    | 0.53   | 1.90    | 1.08   | 1.02   |                    | 0.14  | 0.55    | 0.26  | 0.05  |
|                    | 0.54   | 1.96    | 0.58   | 0.67   |                    | 0.09  | 0.41    | 0.29  | 0.06  |
|                    |        |         |        |        |                    |       |         |       |       |
|                    |        |         |        |        |                    |       |         |       |       |
| Groups             | NC     | HFD+DSS | L-THL  | H-THL  | Groups             | NC    | HFD+DSS | L-THL | H-THL |
| Serum LPS(EU/ML)   |        |         |        |        |                    |       |         |       |       |
|                    | 0.6486 | 1.3708  | 0.4984 | 0.3071 |                    |       |         |       |       |
|                    | 0.5805 | 0.8755  | 0.4848 | 0.4780 |                    |       |         |       |       |
|                    | 0.6626 | 1.2857  | 0.5213 | 0.5343 |                    |       |         |       |       |
|                    | 0.5758 | 0.7600  | 0.4963 | 0.4316 |                    |       |         |       |       |
|                    | 0.5325 | 0.7188  | 0.4737 | 0.4959 |                    |       |         |       |       |
|                    | 0.6242 | 0.6314  | 0.5741 | 0.3266 |                    |       |         |       |       |

| Groups                   | NC     | HFD+DSS | L-THL  | H-THL  | Groups                      | NC    | HFD+DSS | L-THL | H-THL |
|--------------------------|--------|---------|--------|--------|-----------------------------|-------|---------|-------|-------|
| Liver SOD(U/ mgprot)     | 20.15  | 20.19   | 20.79  | 21.06  | Liver MDA(nmol/mgprot)      | 3.35  | 3.06    | 1.91  | 2.13  |
|                          | 15.86  | 24.55   | 24.42  | 35.31  |                             | 0.62  | 4.53    | 1.78  | 1.95  |
|                          | 27.80  | 23.81   | 18.15  | 27.32  |                             | 2.35  | 3.27    | 1.63  | 1.29  |
|                          | 20.44  | 24.53   | 35.59  | 27.18  |                             | 4.65  | 5.43    | 1.84  | 1.92  |
|                          | 24.63  | 18.87   | 26.56  | 27.87  |                             | 2.25  | 4.49    | 1.79  | 1.09  |
|                          | 37.42  | 22.53   | 19.56  | 28.83  |                             | 1.25  | 4.26    | 2.06  | 2.87  |
|                          |        |         |        |        |                             |       |         |       |       |
| Groups                   | NC     | HFD+DSS | L-THL  | H-THL  | Groups                      | NC    | HFD+DSS | L-THL | H-THL |
| Serum LDL-C(mmol/L)      | 1.70   | 1.98    | 1.66   | 1.76   | Serum HDL-C(mmol/L)         | 4.32  | 2.84    | 4.16  | 3.64  |
|                          | 1.80   | 1.92    | 1.60   | 1.26   |                             | 4.02  | 2.52    | 3.74  | 3.14  |
|                          | 1.48   | 2.38    | 1.72   | 1.31   |                             | 5.02  | 3.06    | 3.72  | 4.52  |
|                          | 1.68   | 2.08    | 1.80   | 1.52   |                             | 4.00  | 2.52    | 4.05  | 3.68  |
|                          | 1.40   | 2.00    | 1.06   | 0.84   |                             | 4.28  | 2.40    | 3.91  | 4.64  |
|                          | 1.08   | 2.78    | 1.72   | 1.14   |                             | 5.38  | 2.32    | 3.76  | 3.94  |
|                          |        |         |        |        |                             |       |         |       |       |
| Groups                   | NC     | HFD+DSS | L-THL  | H-THL  | Groups                      | NC    | HFD+DSS | L-THL | H-THL |
| Faece Acetic acid(mg/ml) | 133.95 | 37.52   | 139.74 | 395.82 | Faece Propionic acid(mg/ml) | 62.42 | 22.07   | 34.89 | 33.10 |
|                          | 135.20 | 35.89   | 171.41 | 384.19 |                             | 57.86 | 22.63   | 35.00 | 35.90 |
|                          | 155.06 | 64.22   | 223.41 | 207.03 |                             | 76.87 | 18.99   | 24.32 | 38.34 |
|                          | 121.11 | 15.12   | 145.26 | 376.63 |                             | 47.42 | 20.88   | 28.58 | 38.14 |
|                          | 162.08 | 43.36   | 232.08 | 173.45 |                             | 69.38 | 25.77   | 55.55 | 32.96 |

|                                    | 102.28 | 29.49   | 183.24 | 306.89 |                                         | 56.94    | 23.97    | 35.80    | 35.37  |
|------------------------------------|--------|---------|--------|--------|-----------------------------------------|----------|----------|----------|--------|
|                                    |        |         |        |        |                                         |          |          |          |        |
| <b>Groups</b>                      |        |         |        |        | <b>Groups</b>                           |          |          |          |        |
| <b>Faece Butyric acid(mg/ml)</b>   | NC     | HFD+DSS | L-THL  | H-THL  | <b>Faece total SCFA(mg/ml)</b>          | NC       | HFD+DSS  | L-THL    | H-THL  |
|                                    | 13.54  | 9.30    | 9.25   | 7.62   |                                         | 187.34   | 142.90   | 189.97   | 389.37 |
|                                    | 11.97  | 7.08    | 11.27  | 9.84   |                                         | 127.85   | 115.87   | 124.16   | 432.19 |
|                                    | 12.75  | 8.83    | 12.51  | 7.46   |                                         | 258.75   | 97.04    | 259.73   | 256.80 |
|                                    | 16.70  | 8.01    | 11.19  | 12.49  |                                         | 200.08   | 51.16    | 189.74   | 230.12 |
|                                    | 17.08  | 8.75    | 13.09  | 16.72  |                                         | 147.80   | 92.13    | 138.19   | 225.26 |
|                                    |        |         |        |        |                                         | 143.52   | 58.75    | 181.22   | 306.25 |
|                                    |        |         |        |        |                                         |          |          |          |        |
| <b>Groups</b>                      |        |         |        |        | <b>Groups</b>                           |          |          |          |        |
| <b>colon IL-6(pg/mL)</b>           | NC     | HFD+DSS | L-THL  | H-THL  | <b>colon TNF-a(pg/mL)</b>               | NC       | HFD+DSS  | L-THL    | H-THL  |
|                                    | 102.13 | 149.63  | 48.38  | 76.63  |                                         | 338.52   | 548.00   | 330.33   | 409.82 |
|                                    | 90.88  | 127.13  | 40.88  | 47.38  |                                         | 464.75   | 482.55   | 364.75   | 649.82 |
|                                    | 75.84  | 127.94  | 37.13  | 44.13  |                                         | 371.31   | 471.64   | 366.39   | 478.91 |
|                                    | 108.38 | 130.88  | 63.38  | 53.90  |                                         | 318.85   | 700.73   | 274.59   | 544.36 |
|                                    | 42.19  | 125.88  | 44.24  | 35.38  |                                         | 338.52   | 744.36   | 318.85   | 337.09 |
|                                    | 34.13  | 109.63  | 30.88  | 66.63  |                                         | 366.73   | 587.12   | 279.51   | 483.31 |
|                                    |        |         |        |        |                                         |          |          |          |        |
| <b>Groups</b>                      |        |         |        |        | <b>Groups</b>                           |          |          |          |        |
| <b>liver weight/body weight(%)</b> | NC     | HFD+DSS | L-THL  | H-THL  | <b>Lactobacillus Relative abundance</b> | NC       | HFD+DSS  | H-THL    |        |
|                                    | 4.26   | 5       | 5.38   | 4.3    |                                         | 0.009058 | 0.001253 | 0.002102 |        |
|                                    | 3.52   | 4.78    | 4.71   | 4.07   |                                         | 0.008755 | 0.001863 | 0.007743 |        |
|                                    | 4.46   | 5.26    | 3.04   | 3.8    |                                         | 0.010695 | 0.001977 | 0.001793 |        |
|                                    | 4.56   | 4.67    | 4.85   | 3.5    |                                         | 0.011070 | 0.000480 | 0.013918 |        |



| Liver    | NC   | HFD+DSS | L-THL | H-THL |  | Liver       | NC   | HFD+DSS | L-THL | H-THL |
|----------|------|---------|-------|-------|--|-------------|------|---------|-------|-------|
| NQO1     | 0.91 | 0.76    | 0.79  | 2.02  |  | HO-1        | 1.47 | 0.58    | 0.18  | 1.03  |
|          | 1.59 | 0.62    | 0.98  | 1.76  |  |             | 0.98 | 0.55    | 0.17  | 0.74  |
|          | 1.03 | 0.84    | 0.83  | 2.13  |  |             | 0.96 | 0.42    | 0.16  | 1.21  |
|          | 1.38 | 0.68    | 1.07  | 1.91  |  |             | 1.53 | 0.57    | 0.41  | 1.03  |
| Colon    | NC   | HFD+DSS | L-THL | H-THL |  | Colon       | NC   | HFD+DSS | L-THL | H-THL |
| Keap1    | 0.87 | 1.21    | 0.78  | 0.78  |  | Nrf2        | 0.94 | 0.58    | 0.97  | 1.33  |
|          | 0.83 | 1.25    | 0.98  | 0.63  |  |             | 1.07 | 0.48    | 1.09  | 1.36  |
|          | 0.91 | 1.16    | 0.87  | 0.98  |  |             | 1.39 | 0.47    | 1.12  | 1.38  |
|          | 0.98 | 1.03    | 0.85  | 0.87  |  |             | 1.14 | 0.39    | 0.89  | 1.31  |
| Colon    | NC   | HFD+DSS | L-THL | H-THL |  | Colon       | NC   | HFD+DSS | L-THL | H-THL |
| NQO1     | 1.12 | 0.84    | 0.88  | 0.72  |  | HO-1        | 1.35 | 0.85    | 0.76  | 1.95  |
|          | 1.10 | 0.76    | 1.00  | 1.06  |  |             | 1.49 | 1.04    | 0.85  | 0.94  |
|          | 1.19 | 0.71    | 0.91  | 1.25  |  |             | 0.93 | 0.78    | 0.69  | 1.33  |
|          | 1.06 | 0.69    | 0.95  | 1.17  |  |             | 0.97 | 0.92    | 0.83  | 1.69  |
| Colon    | NC   | HFD+DSS | L-THL | H-THL |  | Colon       | NC   | HFD+DSS | L-THL | H-THL |
| GCLC     | 0.98 | 0.90    | 0.65  | 1.33  |  | ZO-1(TJP-1) | 1.05 | 0.43    | 0.13  | 0.45  |
|          | 1.16 | 0.93    | 0.87  | 1.44  |  |             | 1.02 | 0.28    | 0.61  | 1.33  |
|          | 1.16 | 1.02    | 1.20  | 1.27  |  |             | 1.04 | 0.41    | 0.15  | 0.62  |
|          | 1.10 | 0.91    | 0.64  | 1.23  |  |             | 0.95 | 0.37    | 0.47  | 1.07  |
| Colon    | NC   | HFD+DSS | L-THL | H-THL |  |             |      |         |       |       |
| occludin | 1.16 | 0.24    | 0.49  | 0.30  |  |             |      |         |       |       |
|          | 1.23 | 0.30    | 0.61  | 0.64  |  |             |      |         |       |       |
|          | 0.85 | 0.40    | 0.50  | 0.67  |  |             |      |         |       |       |
|          | 0.84 | 0.26    | 0.58  | 0.89  |  |             |      |         |       |       |

|       |         |      | Body Weight(g) |      |         |      |      |      |      |      |      |  |
|-------|---------|------|----------------|------|---------|------|------|------|------|------|------|--|
| weeks | unit: g |      |                |      |         | NC   |      |      |      |      |      |  |
| 1     | 18.6    | 18.6 | 18.7           | 19.3 | 19.6    | 20   | 20   | 20.4 | 20   | 20.8 | 19.7 |  |
| 2     | 19.7    | 19   | 19.6           | 20.4 | 20.3    | 20   | 20.3 | 20.1 | 20.2 | 22   | 20.9 |  |
| 3     | 20.3    | 20   | 20             | 21.3 | 21.1    | 22.2 | 22.6 | 23.2 | 22.8 | 22.9 | 21.5 |  |
| 4     | 20      | 20   | 20.3           | 21   | 21.5    | 21.2 | 21.6 | 22.1 | 23.3 | 23.7 | 21.8 |  |
| 5     | 20.8    | 20.8 | 20.6           | 21.7 | 22.3    | 21.8 | 22.3 | 22.6 | 23.3 | 24.5 | 22.3 |  |
| 6     | 20.9    | 21.3 | 20.5           | 22.3 | 22.9    | 23.1 | 23.2 | 23.9 | 23.3 | 24.6 | 22.6 |  |
| 7     | 20.8    | 21.6 | 21.4           | 22.9 | 22.5    | 22.2 | 23.2 | 23.5 | 24.3 | 25.1 | 22.1 |  |
| 8     | 21.7    | 23   | 22.5           | 23   | 23.3    | 22.6 | 23.3 | 23.9 | 25.1 | 25.1 | 22.5 |  |
| 9     | 22      | 21.7 | 21.7           | 22.6 | 21.9    | 23   | 23.6 | 24.5 | 24.8 | 25.9 | 22.9 |  |
| 10    | 22.5    | 22.3 | 22             | 23   | 23.7    | 23.5 | 23.6 | 24.4 | 24.7 | 27   | 23   |  |
| 11    | 22.5    | 22.9 | 22.8           | 23.7 | 24.2    | 24.2 | 22.8 | 24.5 | 25.7 | 26.8 | 23.5 |  |
| 12    | 24.5    | 24.5 | 25.5           | 25   | 25.5    | 25   | 25.5 | 27.5 | 28.5 | 27   | 24   |  |
| 13    | 24.8    | 25   | 25.9           | 25.4 | 26      | 24.5 | 23.5 | 25   | 25.5 | 28   | 23   |  |
| 14    | 24.5    | 23.9 | 24.2           | 24.6 | 25      | 24   | 23.7 | 25.4 | 26.2 | 27.3 | 23.5 |  |
| 15    | 24      | 23.7 | 24             | 24.4 | 25      | 24.2 | 24.9 | 25.2 | 25.8 | 28.1 | 23.6 |  |
| 16    | 25      | 23.3 | 26.4           | 24.9 | 27.1    | 25.3 | 27   | 28.4 | 26.3 | 28.2 | 25   |  |
| weeks | unit: g |      |                |      | HFD+DSS |      |      |      |      |      |      |  |
| 1     | 18.8    | 18.7 | 19.2           | 19.4 | 19.6    | 19.7 | 20   | 19.9 | 19.6 | 20.9 | 21.5 |  |
| 2     | 19.4    | 19.2 | 19.9           | 20.1 | 20.4    | 20.4 | 21   | 20.4 | 20.9 | 22.2 | 22.5 |  |
| 3     | 20.3    | 20   | 20.8           | 21   | 21.5    | 21.6 | 22.2 | 21.4 | 22   | 23.2 | 23.2 |  |
| 4     | 20.7    | 20.7 | 21.2           | 21.6 | 21.7    | 22.5 | 22.8 | 21.7 | 22   | 24.3 | 24.4 |  |
| 5     | 20.8    | 20.9 | 22.2           | 22.1 | 22.2    | 23.1 | 23.4 | 21.3 | 21.6 | 24.4 | 24.4 |  |
| 6     | 20.8    | 21.3 | 22.5           | 22.4 | 23.1    | 23.5 | 24   | 24.1 | 22.7 | 24.9 | 24.5 |  |
| 7     | 23.6    | 22.5 | 24.9           | 24.7 | 23.9    | 25.5 | 25.2 | 25.1 | 24.6 | 25.6 | 26.9 |  |
| 8     | 23.4    | 23.1 | 25.2           | 25.2 | 24.7    | 25.8 | 26.4 | 26.3 | 26.3 | 26.3 | 28.5 |  |
| 9     | 24.2    | 23.4 | 25.4           | 25.9 | 25.3    | 26   | 25.9 | 26.4 | 27.7 | 28.1 | 30   |  |
| 10    | 25.6    | 24.6 | 26.2           | 27.3 | 26.5    | 26.7 | 27.7 | 27.3 | 28.6 | 27.6 | 29.7 |  |
| 11    | 24.3    | 23.7 | 25.7           | 26.8 | 25.8    | 27   | 27.6 | 26.9 | 27.7 | 25.1 | 27.8 |  |
| 12    | 26      | 25   | 28             | 28.5 | 26.5    | 28   | 29.5 | 29   | 30.5 | 28   | 31   |  |
| 13    | 25.5    | 24.5 | 28.3           | 27.5 | 25      | 27   | 27   | 28.5 | 27.5 | 27.5 | 28.5 |  |
| 14    | 26.6    | 25.7 | 27.4           | 29.3 | 26.8    | 27.9 | 28.7 | 29   | 29.2 | 28.7 | 30   |  |
| 15    | 25.8    | 25   | 27.1           | 27.9 | 26.9    | 26.9 | 28   | 28.1 | 28.1 | 28.8 | 30   |  |
| 16    | 31.1    | 32.5 | 32.3           | 32.1 | 29.6    | 28.2 | 31.9 | 33.3 | 28.9 | 30   | 31.5 |  |







| Groups                        |      |        |      |       |  |  |  |  |  |  |  |
|-------------------------------|------|--------|------|-------|--|--|--|--|--|--|--|
| Summed<br>OGTT<br>AUC(mmol/L) | NC   | HFD+DL | THL  | H-THL |  |  |  |  |  |  |  |
|                               | 744  | 1926   | 1080 | 1464  |  |  |  |  |  |  |  |
|                               | 1208 | 2051   | 1370 | 1416  |  |  |  |  |  |  |  |
|                               | 1108 | 1799   | 1422 | 1817  |  |  |  |  |  |  |  |
|                               | 1139 | 1953   | 1369 | 948.8 |  |  |  |  |  |  |  |
|                               | 1163 | 1875   | 1574 | 1211  |  |  |  |  |  |  |  |
|                               | 1218 | 2061   | 1499 | 1473  |  |  |  |  |  |  |  |



| Groups                     | NC      | HFD    | HFD+DS | L-THL  | H-THL  |       |       |       |       |       |       |  |
|----------------------------|---------|--------|--------|--------|--------|-------|-------|-------|-------|-------|-------|--|
| Mean of D-mannitol (ng/ml) | 130.97  | 193.41 | 227.52 | 184.53 | 156.50 |       |       |       |       |       |       |  |
|                            | 158.36  | 195.28 | 212.57 | 164.91 | 174.25 |       |       |       |       |       |       |  |
|                            | 154.63  | 172.85 | 203.69 | 195.75 | 171.92 |       |       |       |       |       |       |  |
|                            | 147.64  | 163.04 | 204.61 | 180.33 | 157.90 |       |       |       |       |       |       |  |
|                            | 150.35  | 164.44 | 223.60 | 170.23 | 156.03 |       |       |       |       |       |       |  |
|                            | 151.90  | 224.72 | 202.29 | 178.42 | 163.35 |       |       |       |       |       |       |  |
| Groups                     | NC      | HFD    | HFD+DS | L-THL  | H-THL  |       |       |       |       |       |       |  |
| Body weight increment (g)  | 6.40    | 10.60  | 12.30  | 6.10   | 5.60   |       |       |       |       |       |       |  |
|                            | 4.70    | 10.90  | 13.80  | 8.70   | 4.40   |       |       |       |       |       |       |  |
|                            | 7.70    | 9.90   | 13.10  | 6.00   | 6.70   |       |       |       |       |       |       |  |
|                            | 5.60    | 9.40   | 12.70  | 6.60   | 3.50   |       |       |       |       |       |       |  |
|                            | 7.50    | 9.80   | 10.00  | 6.40   | 5.30   |       |       |       |       |       |       |  |
|                            | 5.30    | 10.60  | 8.50   | 6.80   | 6.00   |       |       |       |       |       |       |  |
|                            | 7.00    | 9.10   | 11.90  | 6.70   | 3.50   |       |       |       |       |       |       |  |
|                            | 8.00    | 13.00  | 13.40  | 6.90   | 3.70   |       |       |       |       |       |       |  |
|                            | 6.30    | 9.10   | 9.30   | 7.60   | 6.00   |       |       |       |       |       |       |  |
|                            | 7.40    | 13.00  | 9.10   | 7.60   | 7.50   |       |       |       |       |       |       |  |
|                            | 5.30    | 8.80   | 10.00  | 6.60   | 6.10   |       |       |       |       |       |       |  |
| Body weight                |         |        |        |        |        |       |       |       |       |       |       |  |
|                            | unit: g |        |        |        |        | NC    |       |       |       |       |       |  |
| weeks                      |         |        |        |        |        |       |       |       |       |       |       |  |
| 1                          | 18.60   | 18.60  | 18.70  | 19.30  | 19.60  | 20.00 | 20.00 | 20.40 | 20.00 | 20.80 | 19.70 |  |
| 2                          | 19.70   | 19.00  | 19.60  | 20.40  | 20.30  | 20.00 | 20.30 | 20.10 | 20.20 | 22.00 | 20.90 |  |
| 3                          | 20.30   | 20.00  | 20.00  | 21.30  | 21.10  | 22.20 | 22.60 | 23.20 | 22.80 | 22.90 | 21.50 |  |
| 4                          | 20.00   | 20.00  | 20.30  | 21.00  | 21.50  | 21.20 | 21.60 | 22.10 | 23.30 | 23.70 | 21.80 |  |



|       |         |       |       |       |       |       |       |       |       |       |       |  |
|-------|---------|-------|-------|-------|-------|-------|-------|-------|-------|-------|-------|--|
| 6     | 20.80   | 21.30 | 22.50 | 22.40 | 23.10 | 23.50 | 24.00 | 24.10 | 22.70 | 24.90 | 24.50 |  |
| 7     | 23.60   | 22.50 | 24.90 | 24.70 | 23.90 | 25.50 | 25.20 | 25.10 | 24.60 | 25.60 | 26.90 |  |
| 8     | 23.40   | 23.10 | 25.20 | 25.20 | 24.70 | 25.80 | 26.40 | 26.30 | 26.30 | 26.30 | 28.50 |  |
| 9     | 24.20   | 23.40 | 25.40 | 25.90 | 25.30 | 26.00 | 25.90 | 26.40 | 27.70 | 28.10 | 30.00 |  |
| 10    | 25.60   | 24.60 | 26.20 | 27.30 | 26.50 | 26.70 | 27.70 | 27.30 | 28.60 | 27.60 | 29.70 |  |
| 11    | 24.30   | 23.70 | 25.70 | 26.80 | 25.80 | 27.00 | 27.60 | 26.90 | 27.70 | 25.10 | 27.80 |  |
| 12    | 26.00   | 25.00 | 28.00 | 28.50 | 26.50 | 28.00 | 29.50 | 29.00 | 30.50 | 28.00 | 31.00 |  |
| 13    | 25.50   | 24.50 | 28.30 | 27.50 | 25.00 | 27.00 | 27.00 | 28.50 | 27.50 | 27.50 | 28.50 |  |
| 14    | 26.60   | 25.70 | 27.40 | 29.30 | 26.80 | 27.90 | 28.70 | 29.00 | 29.20 | 28.70 | 30.00 |  |
| 15    | 25.80   | 25.00 | 27.10 | 27.90 | 26.90 | 26.90 | 28.00 | 28.10 | 28.10 | 28.80 | 30.00 |  |
| 16    | 31.10   | 32.50 | 32.30 | 32.10 | 29.60 | 28.20 | 31.90 | 33.30 | 28.90 | 30.00 | 31.50 |  |
|       |         |       |       |       |       |       |       |       |       |       |       |  |
| weeks | unit: g |       |       |       |       | L-THL |       |       |       |       |       |  |
| 1     | 19.00   | 18.90 | 18.60 | 19.00 | 20.60 | 20.00 | 20.70 | 19.90 | 20.70 | 20.40 | 20.80 |  |
| 2     | 19.40   | 20.30 | 18.50 | 20.00 | 20.50 | 19.70 | 21.30 | 19.90 | 21.60 | 21.30 | 21.50 |  |
| 3     | 20.00   | 20.00 | 19.50 | 20.00 | 21.40 | 20.30 | 21.60 | 20.40 | 21.70 | 21.30 | 20.80 |  |
| 4     | 20.10   | 20.60 | 20.50 | 21.60 | 21.50 | 21.90 | 22.70 | 21.50 | 23.30 | 22.90 | 22.50 |  |
| 5     | 21.30   | 21.80 | 21.30 | 21.10 | 21.50 | 21.90 | 23.20 | 21.60 | 23.00 | 22.30 | 22.80 |  |
| 6     | 21.70   | 21.90 | 21.70 | 22.00 | 23.40 | 23.00 | 23.20 | 22.60 | 23.10 | 23.30 | 23.50 |  |
| 7     | 22.30   | 22.90 | 21.60 | 22.30 | 25.80 | 23.00 | 24.40 | 24.00 | 24.30 | 24.20 | 23.90 |  |
| 8     | 22.70   | 23.50 | 22.30 | 24.00 | 25.90 | 23.70 | 25.10 | 25.30 | 25.90 | 25.90 | 25.10 |  |
| 9     | 23.90   | 25.80 | 23.80 | 22.90 | 26.00 | 24.30 | 25.70 | 25.00 | 25.10 | 26.20 | 25.30 |  |
| 10    | 24.70   | 24.50 | 24.00 | 23.70 | 27.20 | 24.60 | 26.30 | 25.70 | 25.10 | 27.30 | 25.40 |  |
| 11    | 24.80   | 25.50 | 25.30 | 25.40 | 28.80 | 26.20 | 26.70 | 25.80 | 26.90 | 26.60 | 26.30 |  |
| 12    | 24.50   | 26.00 | 25.50 | 26.50 | 29.00 | 27.50 | 27.50 | 26.50 | 27.00 | 27.00 | 26.50 |  |
| 13    | 24.00   | 26.50 | 24.50 | 26.00 | 28.50 | 27.00 | 27.00 | 24.90 | 28.00 | 29.00 | 26.00 |  |
| 14    | 25.10   | 26.80 | 25.10 | 25.90 | 27.20 | 26.90 | 27.60 | 26.70 | 27.10 | 28.10 | 27.30 |  |
| 15    | 24.70   | 24.90 | 23.90 | 25.40 | 27.00 | 26.00 | 25.60 | 25.50 | 26.10 | 26.60 | 25.30 |  |
| 16    | 25.10   | 27.60 | 24.60 | 25.80 | 27.00 | 26.80 | 27.40 | 26.80 | 28.30 | 28.00 | 27.40 |  |
|       |         |       |       |       |       |       |       |       |       |       |       |  |
| weeks | unit: g |       |       |       |       | H-THL |       |       |       |       |       |  |
| 1     | 20.00   | 20.90 | 20.30 | 20.60 | 20.60 | 21.60 | 21.40 | 21.30 | 21.80 | 21.10 | 21.10 |  |
| 2     | 19.00   | 20.80 | 18.90 | 20.70 | 20.00 | 21.40 | 20.10 | 20.80 | 20.80 | 19.90 | 20.40 |  |
| 3     | 20.00   | 22.00 | 20.00 | 21.90 | 22.00 | 22.90 | 21.70 | 21.20 | 22.00 | 21.40 | 20.80 |  |
| 4     | 20.30   | 21.90 | 20.40 | 22.00 | 22.50 | 22.50 | 21.00 | 23.10 | 23.80 | 23.50 | 22.70 |  |
| 5     | 20.40   | 21.60 | 21.10 | 22.20 | 22.30 | 23.40 | 21.60 | 21.70 | 24.20 | 22.40 | 21.40 |  |
| 6     | 21.50   | 23.50 | 22.60 | 21.60 | 21.90 | 21.50 | 21.80 | 23.60 | 23.00 | 25.00 | 23.50 |  |
| 7     | 22.10   | 23.40 | 22.70 | 23.70 | 23.60 | 25.50 | 22.60 | 24.20 | 24.70 | 26.00 | 24.20 |  |
| 8     | 23.20   | 24.00 | 24.30 | 24.30 | 25.00 | 25.50 | 23.90 | 25.20 | 24.80 | 26.60 | 24.20 |  |

|                                |       |       |         |       |       |       |       |       |         |       |       |      |
|--------------------------------|-------|-------|---------|-------|-------|-------|-------|-------|---------|-------|-------|------|
| 9                              | 24.20 | 24.70 | 24.60   | 24.20 | 25.30 | 27.30 | 24.20 | 24.50 | 24.80   | 26.20 | 24.30 |      |
| 10                             | 24.40 | 25.00 | 23.90   | 24.60 | 25.30 | 27.20 | 23.60 | 24.60 | 26.30   | 27.30 | 24.20 |      |
| 11                             | 25.20 | 25.10 | 26.70   | 23.40 | 24.40 | 26.80 | 25.90 | 25.40 | 27.80   | 28.20 | 25.40 |      |
| 12                             | 26.00 | 26.50 | 26.00   | 24.50 | 26.00 | 28.50 | 27.00 | 26.50 | 29.50   | 29.50 | 27.50 |      |
| 13                             | 25.50 | 24.00 | 25.00   | 23.00 | 24.80 | 27.00 | 27.60 | 27.00 | 28.30   | 29.90 | 28.00 |      |
| 14                             | 25.40 | 26.50 | 26.20   | 23.80 | 26.80 | 27.40 | 25.60 | 26.00 | 27.00   | 28.00 | 25.70 |      |
| 15                             | 24.80 | 25.60 | 27.30   | 24.20 | 26.80 | 27.20 | 25.10 | 26.50 | 26.50   | 27.60 | 26.30 |      |
| 16                             | 25.60 | 25.30 | 27.00   | 24.10 | 25.90 | 27.60 | 24.90 | 25.00 | 27.80   | 28.60 | 27.20 |      |
| Groups                         |       |       |         |       |       |       |       |       |         |       |       |      |
| Blood Glucose<br>Time(min)     |       |       | NC      |       |       |       |       |       | HFD+DSS |       |       |      |
| 0                              | 6.5   | 9.1   | 7       | 7.5   | 7.2   | 8.1   | 11.2  | 9.2   | 9.4     | 9.3   | 10.9  | 12.8 |
| 15                             | 6.7   | 12.2  | 11.9    | 11.5  | 15.7  | 12.1  | 19.3  | 22.2  | 20.4    | 23.7  | 20.6  | 24.1 |
| 30                             | 6.4   | 8.4   | 11.3    | 8.8   | 8.8   | 11.3  | 17.9  | 16.8  | 17.6    | 17.1  | 17.3  | 17.6 |
| 60                             | 6.3   | 10.8  | 9.3     | 10.4  | 10.2  | 10.9  | 15.3  | 17.9  | 13.7    | 15.8  | 15.1  | 17.9 |
| 90                             | 6.2   | 10.5  | 8.5     | 10.6  | 9.1   | 10.2  | 18.7  | 17.2  | 13.3    | 16.2  | 14.7  | 16.3 |
| 120                            | 5.3   | 8.6   | 5.9     | 5.5   | 6.4   | 7.7   | 13.4  | 13.9  | 13.6    | 12.2  | 11.2  | 12.1 |
|                                |       |       |         | L-THL |       |       |       |       | H-THL   |       |       |      |
|                                | 8.9   | 12.3  | 9.9     | 10.2  | 9.8   | 12.9  | 8.2   | 6.3   | 9.7     | 7.6   | 10    | 9.8  |
|                                | 14.3  | 15.2  | 14.7    | 15.3  | 14.6  | 19    | 21.1  | 20.3  | 21.3    | 14.6  | 20.3  | 16.8 |
|                                | 13.6  | 12.9  | 13.7    | 13.3  | 13.5  | 12.9  | 11.2  | 12.3  | 18.2    | 10.7  | 11.4  | 12.2 |
|                                | 13.7  | 10.4  | 11.7    | 10.7  | 13.2  | 10.7  | 10.7  | 11.2  | 14.8    | 9.3   | 12.6  | 12.3 |
|                                | 13.1  | 10.1  | 11      | 9.7   | 14.3  | 12.2  | 12.8  | 9.9   | 12.9    | 10.2  | 13.1  | 10.6 |
|                                | 9.8   | 9.6   | 9.2     | 9.4   | 10.2  | 9.3   | 8.6   | 10.3  | 12.3    | 9.1   | 10.2  | 12.4 |
| Groups                         |       |       |         |       |       |       |       |       |         |       |       |      |
| Summed OGTT<br>AUC(mmol/L·min) | NC    | HFD   | HFD+DSS | L-THL | H-THL |       |       |       |         |       |       |      |
|                                | 744   | 1385  | 1926    | 1080  | 1464  |       |       |       |         |       |       |      |
|                                | 1208  | 1867  | 2051    | 1370  | 1416  |       |       |       |         |       |       |      |
|                                | 1108  | 984   | 1799    | 1422  | 1817  |       |       |       |         |       |       |      |
|                                | 1139  | 1029  | 1953    | 1369  | 948.8 |       |       |       |         |       |       |      |



|                               |      |      |         |       |       |                                |      |         |         |       |       |  |
|-------------------------------|------|------|---------|-------|-------|--------------------------------|------|---------|---------|-------|-------|--|
|                               | 1163 | 1845 | 1875    | 1574  | 1211  |                                |      |         |         |       |       |  |
|                               | 1218 | 1727 | 2061    | 1499  | 1473  |                                |      |         |         |       |       |  |
| Groups<br>Liver TG (mmol/L)   | NC   | HFD  | HFD+DSS | L-THL | H-THL | Groups<br>Liver TC (mmol/L)    | NC   | HFD     | HFD+DSS | L-THL | H-THL |  |
|                               | 0.60 | 1.30 | 2.13    | 1.48  | 1.37  |                                | 0.18 | 0.41    | 0.31    | 0.20  | 0.22  |  |
|                               | 0.46 | 2.15 | 2.04    | 0.44  | 2.41  |                                | 0.08 | 0.37    | 0.28    | 0.39  | 0.37  |  |
|                               | 0.43 | 1.02 | 1.91    | 1.19  | 1.77  |                                | 0.07 | 0.38    | 0.49    | 0.35  | 0.21  |  |
|                               | 0.70 | 1.08 | 1.77    | 1.15  | 0.74  |                                | 0.08 | 0.30    | 0.39    | 0.24  | 0.38  |  |
|                               | 0.53 | 1.10 | 1.90    | 1.08  | 1.02  |                                | 0.14 | 0.38    | 0.55    | 0.26  | 0.05  |  |
|                               | 0.54 | 1.33 | 1.96    | 0.58  | 0.67  |                                | 0.09 | 0.37    | 0.41    | 0.29  | 0.06  |  |
|                               |      |      |         |       |       |                                |      |         |         |       |       |  |
|                               |      |      |         |       |       |                                |      |         |         |       |       |  |
| Groups<br>Serum LDL-C(mmol/L) | NC   | HFD  | HFD+DSS | L-THL | H-THL | Groups<br>Serum HDL-C (mmol/L) | NC   | HFD     | HFD+DSS | L-THL | H-THL |  |
|                               | 1.70 | 1.7  | 1.98    | 1.66  | 1.76  |                                | 4.32 | 3.04    | 2.84    | 4.16  | 3.64  |  |
|                               | 1.80 | 1.8  | 1.92    | 1.60  | 1.26  |                                | 4.02 | 3.46    | 2.52    | 3.74  | 3.14  |  |
|                               | 1.48 | 2.28 | 2.38    | 1.72  | 1.31  |                                | 5.02 | 3.72    | 3.06    | 3.72  | 4.52  |  |
|                               | 1.68 | 1.74 | 2.08    | 1.80  | 1.52  |                                | 4.00 | 3.66    | 2.52    | 4.05  | 3.68  |  |
|                               | 1.40 | 1.78 | 2.00    | 1.06  | 0.84  |                                | 4.28 | 3.62    | 2.40    | 3.91  | 4.64  |  |
|                               | 1.08 | 1.7  | 2.78    | 1.72  | 1.14  |                                | 5.38 | 3.53    | 2.32    | 3.76  | 3.94  |  |
|                               |      |      |         |       |       |                                |      |         |         |       |       |  |
| Groups<br>Food intake (g/day) | NC   |      |         |       |       |                                |      | HFD+DSS |         |       |       |  |
|                               | 4.30 | 5.20 | 5.20    |       |       |                                |      | 6.20    | 5.30    | 4.30  |       |  |
|                               | 5.30 | 5.30 | 5.40    |       |       |                                |      | 4.60    | 5.00    | 5.30  |       |  |





**spearman correlation analysis of some parameters and microbita in THL group**

| Data1          | Data2                                                 | rho     | pvalue | relation |
|----------------|-------------------------------------------------------|---------|--------|----------|
| Liver_TC       | D_4_Verrucomicrobiaceae;D_5_Akkermansia               | 0.4286  | 0.4194 | positive |
| Liver_TG       | D_4_Verrucomicrobiaceae;D_5_Akkermansia               | 0.6983  | 0.1228 | positive |
| Liver_PPAR_a   | D_4_Verrucomicrobiaceae;D_5_Akkermansia               | 0.6957  | 0.1248 | positive |
| Liver_PPAR_γ   | D_4_Verrucomicrobiaceae;D_5_Akkermansia               | 0.7590  | 0.0801 | positive |
| Liver_SREBP_1c | D_4_Verrucomicrobiaceae;D_5_Akkermansia               | 0.8804  | 0.0206 | positive |
| Liver_Keap1    | D_4_Verrucomicrobiaceae;D_5_Akkermansia               | 0.9411  | 0.0051 | positive |
| Liver_Nrf2     | D_4_Verrucomicrobiaceae;D_5_Akkermansia               | 0.9411  | 0.0051 | positive |
| Liver_NQO1     | D_4_Verrucomicrobiaceae;D_5_Akkermansia               | 0.4395  | 0.3832 | positive |
| Liver_HO_1     | D_4_Verrucomicrobiaceae;D_5_Akkermansia               | 0.9258  | 0.0080 | positive |
| Liver_ACC_1    | D_4_Verrucomicrobiaceae;D_5_Akkermansia               | 0.7590  | 0.0801 | positive |
| Serum_LDL_C    | D_4_Verrucomicrobiaceae;D_5_Akkermansia               | 0.7714  | 0.1028 | positive |
| Serum_HD_C     | D_4_Verrucomicrobiaceae;D_5_Akkermansia               | -0.0286 | 1.0000 | negtive  |
| Serum_TBA      | D_4_Verrucomicrobiaceae;D_5_Akkermansia               | 0.8804  | 0.0206 | positive |
| Serum_LPS      | D_4_Verrucomicrobiaceae;D_5_Akkermansia               | 0.8804  | 0.0206 | positive |
| Serum_AST      | D_4_Verrucomicrobiaceae;D_5_Akkermansia               | 0.3719  | 0.4679 | positive |
| Serum_MCP_1    | D_4_Verrucomicrobiaceae;D_5_Akkermansia               | -0.7143 | 0.1361 | negtive  |
| Serum_IL_1β    | D_4_Verrucomicrobiaceae;D_5_Akkermansia               | -0.5591 | 0.2488 | negtive  |
| Serum_IL_6     | D_4_Verrucomicrobiaceae;D_5_Akkermansia               | -0.0857 | 0.9194 | negtive  |
| Serum_TNF_a    | D_4_Verrucomicrobiaceae;D_5_Akkermansia               | 0.7590  | 0.0801 | positive |
| Serum_OGTT_AUC | D_4_Verrucomicrobiaceae;D_5_Akkermansia               | 0.5429  | 0.2972 | positive |
| Colon_Keap1    | D_4_Verrucomicrobiaceae;D_5_Akkermansia               | 0.8117  | 0.0499 | positive |
| Colon_Nrf2     | D_4_Verrucomicrobiaceae;D_5_Akkermansia               | 0.4395  | 0.3832 | positive |
| Colon_NQO1     | D_4_Verrucomicrobiaceae;D_5_Akkermansia               | 0.7590  | 0.0801 | positive |
| Colon_HO_1     | D_4_Verrucomicrobiaceae;D_5_Akkermansia               | 0.3719  | 0.4679 | positive |
| Colon_occludin | D_4_Verrucomicrobiaceae;D_5_Akkermansia               | 0.8804  | 0.0206 | positive |
| Colon_TJP_1    | D_4_Verrucomicrobiaceae;D_5_Akkermansia               | 0.3719  | 0.4679 | positive |
| Liver_TC       | D_4_Lachnospiraceae;D_5_Lachnospiraceae NK4A136 group | 0.4286  | 0.4194 | positive |
| Liver_TG       | D_4_Lachnospiraceae;D_5_Lachnospiraceae NK4A136 group | 0.1518  | 0.7741 | positive |
| Liver_PPAR_a   | D_4_Lachnospiraceae;D_5_Lachnospiraceae NK4A136 group | 0.3189  | 0.5379 | positive |
| Liver_PPAR_γ   | D_4_Lachnospiraceae;D_5_Lachnospiraceae NK4A136 group | 0.3947  | 0.4387 | positive |
| Liver_SREBP_1c | D_4_Lachnospiraceae;D_5_Lachnospiraceae NK4A136 group | 0.1518  | 0.7741 | positive |
| Liver_Keap1    | D_4_Lachnospiraceae;D_5_Lachnospiraceae NK4A136 group | 0.3947  | 0.4387 | positive |
| Liver_Nrf2     | D_4_Lachnospiraceae;D_5_Lachnospiraceae NK4A136 group | 0.3947  | 0.4387 | positive |
| Liver_NQO1     | D_4_Lachnospiraceae;D_5_Lachnospiraceae NK4A136 group | -0.2704 | 0.6042 | negtive  |
| Liver_HO_1     | D_4_Lachnospiraceae;D_5_Lachnospiraceae NK4A136 group | 0.2777  | 0.5941 | positive |
| Liver_ACC_1    | D_4_Lachnospiraceae;D_5_Lachnospiraceae NK4A136 group | 0.3947  | 0.4387 | positive |
| Serum_LDL_C    | D_4_Lachnospiraceae;D_5_Lachnospiraceae NK4A136 group | 0.2571  | 0.6583 | positive |
| Serum_HD_C     | D_4_Lachnospiraceae;D_5_Lachnospiraceae NK4A136 group | 0.5429  | 0.2972 | positive |
| Serum_TBA      | D_4_Lachnospiraceae;D_5_Lachnospiraceae NK4A136 group | 0.5161  | 0.2946 | positive |
| Serum_LPS      | D_4_Lachnospiraceae;D_5_Lachnospiraceae NK4A136 group | 0.5161  | 0.2946 | positive |
| Serum_AST      | D_4_Lachnospiraceae;D_5_Lachnospiraceae NK4A136 group | -0.1352 | 0.7984 | negtive  |
| Serum_MCP_1    | D_4_Lachnospiraceae;D_5_Lachnospiraceae NK4A136 group | -0.3714 | 0.4972 | negtive  |
| Serum_IL_1β    | D_4_Lachnospiraceae;D_5_Lachnospiraceae NK4A136 group | -0.5002 | 0.3123 | negtive  |
| Serum_IL_6     | D_4_Lachnospiraceae;D_5_Lachnospiraceae NK4A136 group | 0.6000  | 0.2417 | positive |
| Serum_TNF_a    | D_4_Lachnospiraceae;D_5_Lachnospiraceae NK4A136 group | 0.0304  | 0.9545 | positive |
| Serum_OGTT_AUC | D_4_Lachnospiraceae;D_5_Lachnospiraceae NK4A136 group | -0.0857 | 0.9194 | negtive  |
| Colon_Keap1    | D_4_Lachnospiraceae;D_5_Lachnospiraceae NK4A136 group | 0.7827  | 0.0657 | positive |
| Colon_Nrf2     | D_4_Lachnospiraceae;D_5_Lachnospiraceae NK4A136 group | -0.2704 | 0.6042 | negtive  |
| Colon_NQO1     | D_4_Lachnospiraceae;D_5_Lachnospiraceae NK4A136 group | 0.3947  | 0.4387 | positive |
| Colon_HO_1     | D_4_Lachnospiraceae;D_5_Lachnospiraceae NK4A136 group | -0.1352 | 0.7984 | negtive  |
| Colon_occludin | D_4_Lachnospiraceae;D_5_Lachnospiraceae NK4A136 group | 0.5161  | 0.2946 | positive |
| Colon_TJP_1    | D_4_Lachnospiraceae;D_5_Lachnospiraceae NK4A136 group | -0.1352 | 0.7984 | negtive  |
| Liver_TC       | D_4_Prevotellaceae;D_5_Alloprevotella                 | -0.4286 | 0.4194 | negtive  |
| Liver_TG       | D_4_Prevotellaceae;D_5_Alloprevotella                 | 0.3947  | 0.4387 | positive |
| Liver_PPAR_a   | D_4_Prevotellaceae;D_5_Alloprevotella                 | 0.1739  | 0.7417 | positive |
| Liver_PPAR_γ   | D_4_Prevotellaceae;D_5_Alloprevotella                 | 0.2732  | 0.6004 | positive |
| Liver_SREBP_1c | D_4_Prevotellaceae;D_5_Alloprevotella                 | 0.6375  | 0.1733 | positive |
| Liver_Keap1    | D_4_Prevotellaceae;D_5_Alloprevotella                 | 0.5161  | 0.2946 | positive |

|                      |                                           |         |        |          |
|----------------------|-------------------------------------------|---------|--------|----------|
| Liver_Nrf2           | D_4_Prevotellaceae;D_5_Alloprevotella     | 0.5161  | 0.2946 | positive |
| Liver_NQO1           | D_4_Prevotellaceae;D_5_Alloprevotella     | 0.5071  | 0.3046 | positive |
| Liver_HO_1           | D_4_Prevotellaceae;D_5_Alloprevotella     | 0.5864  | 0.2213 | positive |
| Liver_ACC_1          | D_4_Prevotellaceae;D_5_Alloprevotella     | 0.2732  | 0.6004 | positive |
| Serum_LDL_C          | D_4_Prevotellaceae;D_5_Alloprevotella     | 0.7714  | 0.1028 | positive |
| Serum_HD_C           | D_4_Prevotellaceae;D_5_Alloprevotella     | 0.3714  | 0.4972 | positive |
| Serum_TBA            | D_4_Prevotellaceae;D_5_Alloprevotella     | 0.3339  | 0.5177 | positive |
| Serum_LPS            | D_4_Prevotellaceae;D_5_Alloprevotella     | 0.3339  | 0.5177 | positive |
| Serum_AST            | D_4_Prevotellaceae;D_5_Alloprevotella     | 0.3043  | 0.5577 | positive |
| Serum_MCP_1          | D_4_Prevotellaceae;D_5_Alloprevotella     | -0.3143 | 0.5639 | negative |
| Serum_IL_1 $\beta$   | D_4_Prevotellaceae;D_5_Alloprevotella     | 0.2648  | 0.6121 | positive |
| Serum_IL_6           | D_4_Prevotellaceae;D_5_Alloprevotella     | -0.0286 | 1.0000 | negative |
| Serum_TNF_a          | D_4_Prevotellaceae;D_5_Alloprevotella     | 0.5768  | 0.2307 | positive |
| Serum_OGTT_AUC       | D_4_Prevotellaceae;D_5_Alloprevotella     | 0.2571  | 0.6583 | positive |
| Colon_Keap1          | D_4_Prevotellaceae;D_5_Alloprevotella     | -0.0580 | 0.9131 | negative |
| Colon_Nrf2           | D_4_Prevotellaceae;D_5_Alloprevotella     | 0.5071  | 0.3046 | positive |
| Colon_NQO1           | D_4_Prevotellaceae;D_5_Alloprevotella     | 0.2732  | 0.6004 | positive |
| Colon_HO_1           | D_4_Prevotellaceae;D_5_Alloprevotella     | 0.3043  | 0.5577 | positive |
| Colon_occludin       | D_4_Prevotellaceae;D_5_Alloprevotella     | 0.3339  | 0.5177 | positive |
| Colon_TJP_1          | D_4_Prevotellaceae;D_5_Alloprevotella     | 0.3043  | 0.5577 | positive |
| Liver_TC             | D_4_Desulfovibrionaceae;D_5_Desulfovibrio | -0.3143 | 0.5639 | negative |
| Liver_TG             | D_4_Desulfovibrionaceae;D_5_Desulfovibrio | -0.9411 | 0.0051 | negative |
| Liver_PPAR_a         | D_4_Desulfovibrionaceae;D_5_Desulfovibrio | -0.3769 | 0.4615 | negative |
| Liver_PPAR_ $\gamma$ | D_4_Desulfovibrionaceae;D_5_Desulfovibrio | -0.8804 | 0.0206 | negative |
| Liver_SREBP_1c       | D_4_Desulfovibrionaceae;D_5_Desulfovibrio | -0.7590 | 0.0801 | negative |
| Liver_Keap1          | D_4_Desulfovibrionaceae;D_5_Desulfovibrio | -0.6983 | 0.1228 | negative |
| Liver_Nrf2           | D_4_Desulfovibrionaceae;D_5_Desulfovibrio | -0.6983 | 0.1228 | negative |
| Liver_NQO1           | D_4_Desulfovibrionaceae;D_5_Desulfovibrio | -0.7775 | 0.0687 | negative |
| Liver_HO_1           | D_4_Desulfovibrionaceae;D_5_Desulfovibrio | -0.7407 | 0.0922 | negative |
| Liver_ACC_1          | D_4_Desulfovibrionaceae;D_5_Desulfovibrio | -0.8804 | 0.0206 | negative |
| Serum_LDL_C          | D_4_Desulfovibrionaceae;D_5_Desulfovibrio | -0.8286 | 0.0583 | negative |
| Serum_HD_C           | D_4_Desulfovibrionaceae;D_5_Desulfovibrio | -0.0286 | 1.0000 | negative |
| Serum_TBA            | D_4_Desulfovibrionaceae;D_5_Desulfovibrio | -0.7590 | 0.0801 | negative |
| Serum_LPS            | D_4_Desulfovibrionaceae;D_5_Desulfovibrio | -0.7590 | 0.0801 | negative |
| Serum_AST            | D_4_Desulfovibrionaceae;D_5_Desulfovibrio | -0.8452 | 0.0341 | negative |
| Serum_MCP_1          | D_4_Desulfovibrionaceae;D_5_Desulfovibrio | 0.9429  | 0.0167 | positive |
| Serum_IL_1 $\beta$   | D_4_Desulfovibrionaceae;D_5_Desulfovibrio | -0.2942 | 0.5714 | negative |
| Serum_IL_6           | D_4_Desulfovibrionaceae;D_5_Desulfovibrio | 0.1429  | 0.8028 | positive |
| Serum_TNF_a          | D_4_Desulfovibrionaceae;D_5_Desulfovibrio | -0.8804 | 0.0206 | negative |
| Serum_OGTT_AUC       | D_4_Desulfovibrionaceae;D_5_Desulfovibrio | -0.0857 | 0.9194 | negative |
| Colon_Keap1          | D_4_Desulfovibrionaceae;D_5_Desulfovibrio | -0.2609 | 0.6175 | negative |
| Colon_Nrf2           | D_4_Desulfovibrionaceae;D_5_Desulfovibrio | -0.7775 | 0.0687 | negative |
| Colon_NQO1           | D_4_Desulfovibrionaceae;D_5_Desulfovibrio | -0.8804 | 0.0206 | negative |
| Colon_HO_1           | D_4_Desulfovibrionaceae;D_5_Desulfovibrio | -0.8452 | 0.0341 | negative |
| Colon_occludin       | D_4_Desulfovibrionaceae;D_5_Desulfovibrio | -0.7590 | 0.0801 | negative |
| Colon_TJP_1          | D_4_Desulfovibrionaceae;D_5_Desulfovibrio | -0.8452 | 0.0341 | negative |
| Liver_TC             | D_4_Lachnospiraceae;D_5_Blautia           | -0.6000 | 0.2417 | negative |
| Liver_TG             | D_4_Lachnospiraceae;D_5_Blautia           | -0.9411 | 0.0051 | negative |
| Liver_PPAR_a         | D_4_Lachnospiraceae;D_5_Blautia           | -0.5798 | 0.2278 | negative |
| Liver_PPAR_ $\gamma$ | D_4_Lachnospiraceae;D_5_Blautia           | -0.8804 | 0.0206 | negative |
| Liver_SREBP_1c       | D_4_Lachnospiraceae;D_5_Blautia           | -0.7590 | 0.0801 | negative |
| Liver_Keap1          | D_4_Lachnospiraceae;D_5_Blautia           | -0.6983 | 0.1228 | negative |
| Liver_Nrf2           | D_4_Lachnospiraceae;D_5_Blautia           | -0.6983 | 0.1228 | negative |
| Liver_NQO1           | D_4_Lachnospiraceae;D_5_Blautia           | -0.7775 | 0.0687 | negative |
| Liver_HO_1           | D_4_Lachnospiraceae;D_5_Blautia           | -0.7407 | 0.0922 | negative |
| Liver_ACC_1          | D_4_Lachnospiraceae;D_5_Blautia           | -0.8804 | 0.0206 | negative |
| Serum_LDL_C          | D_4_Lachnospiraceae;D_5_Blautia           | -0.7714 | 0.1028 | negative |
| Serum_HD_C           | D_4_Lachnospiraceae;D_5_Blautia           | 0.0857  | 0.9194 | positive |
| Serum_TBA            | D_4_Lachnospiraceae;D_5_Blautia           | -0.7590 | 0.0801 | negative |
| Serum_LPS            | D_4_Lachnospiraceae;D_5_Blautia           | -0.7590 | 0.0801 | negative |
| Serum_AST            | D_4_Lachnospiraceae;D_5_Blautia           | -0.8452 | 0.0341 | negative |
| Serum_MCP_1          | D_4_Lachnospiraceae;D_5_Blautia           | 1.0000  | 0.0028 | positive |

|                |                                         |         |        |          |
|----------------|-----------------------------------------|---------|--------|----------|
| Serum_IL_1β    | D_4_Lachnospiraceae;D_5_Blautia         | -0.0883 | 0.8679 | negtive  |
| Serum_IL_6     | D_4_Lachnospiraceae;D_5_Blautia         | 0.0857  | 0.9194 | positive |
| Serum_TNF_a    | D_4_Lachnospiraceae;D_5_Blautia         | -0.8804 | 0.0206 | negtive  |
| Serum_OGTT_AUC | D_4_Lachnospiraceae;D_5_Blautia         | -0.0286 | 1.0000 | negtive  |
| Colon_Keap1    | D_4_Lachnospiraceae;D_5_Blautia         | -0.4638 | 0.3542 | negtive  |
| Colon_Nrf2     | D_4_Lachnospiraceae;D_5_Blautia         | -0.7775 | 0.0687 | negtive  |
| Colon_NQO1     | D_4_Lachnospiraceae;D_5_Blautia         | -0.8804 | 0.0206 | negtive  |
| Colon_HO_1     | D_4_Lachnospiraceae;D_5_Blautia         | -0.8452 | 0.0341 | negtive  |
| Colon_occludin | D_4_Lachnospiraceae;D_5_Blautia         | -0.7590 | 0.0801 | negtive  |
| Colon_TJP_1    | D_4_Lachnospiraceae;D_5_Blautia         | -0.8452 | 0.0341 | negtive  |
| Liver_TC       | D_4_Desulfovibrionaceae;D_5_Bilophila   | -0.7714 | 0.1028 | negtive  |
| Liver_TG       | D_4_Desulfovibrionaceae;D_5_Bilophila   | -0.1518 | 0.7741 | negtive  |
| Liver_PPAR_a   | D_4_Desulfovibrionaceae;D_5_Bilophila   | -0.4058 | 0.4247 | negtive  |
| Liver_PPAR_γ   | D_4_Desulfovibrionaceae;D_5_Bilophila   | 0.0304  | 0.9545 | positive |
| Liver_SREBP_1c | D_4_Desulfovibrionaceae;D_5_Bilophila   | 0.1518  | 0.7741 | positive |
| Liver_Keap1    | D_4_Desulfovibrionaceae;D_5_Bilophila   | 0.3339  | 0.5177 | positive |
| Liver_Nrf2     | D_4_Desulfovibrionaceae;D_5_Bilophila   | 0.3339  | 0.5177 | positive |
| Liver_NQO1     | D_4_Desulfovibrionaceae;D_5_Bilophila   | -0.3719 | 0.4679 | negtive  |
| Liver_HO_1     | D_4_Desulfovibrionaceae;D_5_Bilophila   | 0.2469  | 0.6372 | positive |
| Liver_ACC_1    | D_4_Desulfovibrionaceae;D_5_Bilophila   | 0.0304  | 0.9545 | positive |
| Serum_LDL_C    | D_4_Desulfovibrionaceae;D_5_Bilophila   | 0.0857  | 0.9194 | positive |
| Serum_HD_C     | D_4_Desulfovibrionaceae;D_5_Bilophila   | 0.1429  | 0.8028 | positive |
| Serum_TBA      | D_4_Desulfovibrionaceae;D_5_Bilophila   | 0.2732  | 0.6004 | positive |
| Serum_LPS      | D_4_Desulfovibrionaceae;D_5_Bilophila   | 0.2732  | 0.6004 | positive |
| Serum_AST      | D_4_Desulfovibrionaceae;D_5_Bilophila   | -0.4395 | 0.3832 | negtive  |
| Serum_MCP_1    | D_4_Desulfovibrionaceae;D_5_Bilophila   | 0.3714  | 0.4972 | positive |
| Serum_IL_1β    | D_4_Desulfovibrionaceae;D_5_Bilophila   | -0.2648 | 0.6121 | negtive  |
| Serum_IL_6     | D_4_Desulfovibrionaceae;D_5_Bilophila   | -0.3143 | 0.5639 | negtive  |
| Serum_TNF_a    | D_4_Desulfovibrionaceae;D_5_Bilophila   | -0.0911 | 0.8638 | negtive  |
| Serum_OGTT_AUC | D_4_Desulfovibrionaceae;D_5_Bilophila   | 0.8286  | 0.0583 | positive |
| Colon_Keap1    | D_4_Desulfovibrionaceae;D_5_Bilophila   | -0.0580 | 0.9131 | negtive  |
| Colon_Nrf2     | D_4_Desulfovibrionaceae;D_5_Bilophila   | -0.3719 | 0.4679 | negtive  |
| Colon_NQO1     | D_4_Desulfovibrionaceae;D_5_Bilophila   | 0.0304  | 0.9545 | positive |
| Colon_HO_1     | D_4_Desulfovibrionaceae;D_5_Bilophila   | -0.4395 | 0.3832 | negtive  |
| Colon_occludin | D_4_Desulfovibrionaceae;D_5_Bilophila   | 0.2732  | 0.6004 | positive |
| Colon_TJP_1    | D_4_Desulfovibrionaceae;D_5_Bilophila   | -0.4395 | 0.3832 | negtive  |
| Liver_TC       | D_4_Coriobacteriaceae;D_5_Enterorhabdus | -0.0286 | 1.0000 | negtive  |
| Liver_TG       | D_4_Coriobacteriaceae;D_5_Enterorhabdus | -0.3339 | 0.5177 | negtive  |
| Liver_PPAR_a   | D_4_Coriobacteriaceae;D_5_Enterorhabdus | -0.0580 | 0.9131 | negtive  |
| Liver_PPAR_γ   | D_4_Coriobacteriaceae;D_5_Enterorhabdus | -0.2125 | 0.6860 | negtive  |
| Liver_SREBP_1c | D_4_Coriobacteriaceae;D_5_Enterorhabdus | -0.3339 | 0.5177 | negtive  |
| Liver_Keap1    | D_4_Coriobacteriaceae;D_5_Enterorhabdus | -0.2125 | 0.6860 | negtive  |
| Liver_Nrf2     | D_4_Coriobacteriaceae;D_5_Enterorhabdus | -0.2125 | 0.6860 | negtive  |
| Liver_NQO1     | D_4_Coriobacteriaceae;D_5_Enterorhabdus | -0.4395 | 0.3832 | negtive  |
| Liver_HO_1     | D_4_Coriobacteriaceae;D_5_Enterorhabdus | -0.2777 | 0.5941 | negtive  |
| Liver_ACC_1    | D_4_Coriobacteriaceae;D_5_Enterorhabdus | -0.2125 | 0.6860 | negtive  |
| Serum_LDL_C    | D_4_Coriobacteriaceae;D_5_Enterorhabdus | -0.0286 | 1.0000 | negtive  |
| Serum_HD_C     | D_4_Coriobacteriaceae;D_5_Enterorhabdus | 0.8857  | 0.0333 | positive |
| Serum_TBA      | D_4_Coriobacteriaceae;D_5_Enterorhabdus | -0.1518 | 0.7741 | negtive  |
| Serum_LPS      | D_4_Coriobacteriaceae;D_5_Enterorhabdus | -0.1518 | 0.7741 | negtive  |
| Serum_AST      | D_4_Coriobacteriaceae;D_5_Enterorhabdus | -0.3719 | 0.4679 | negtive  |
| Serum_MCP_1    | D_4_Coriobacteriaceae;D_5_Enterorhabdus | 0.0857  | 0.9194 | positive |
| Serum_IL_1β    | D_4_Coriobacteriaceae;D_5_Enterorhabdus | 0.0294  | 0.9559 | positive |
| Serum_IL_6     | D_4_Coriobacteriaceae;D_5_Enterorhabdus | 0.8857  | 0.0333 | positive |
| Serum_TNF_a    | D_4_Coriobacteriaceae;D_5_Enterorhabdus | -0.3947 | 0.4387 | negtive  |
| Serum_OGTT_AUC | D_4_Coriobacteriaceae;D_5_Enterorhabdus | -0.6000 | 0.2417 | negtive  |
| Colon_Keap1    | D_4_Coriobacteriaceae;D_5_Enterorhabdus | 0.1739  | 0.7417 | positive |
| Colon_Nrf2     | D_4_Coriobacteriaceae;D_5_Enterorhabdus | -0.4395 | 0.3832 | negtive  |
| Colon_NQO1     | D_4_Coriobacteriaceae;D_5_Enterorhabdus | -0.2125 | 0.6860 | negtive  |
| Colon_HO_1     | D_4_Coriobacteriaceae;D_5_Enterorhabdus | -0.3719 | 0.4679 | negtive  |
| Colon_occludin | D_4_Coriobacteriaceae;D_5_Enterorhabdus | -0.1518 | 0.7741 | negtive  |
| Colon_TJP_1    | D_4_Coriobacteriaceae;D_5_Enterorhabdus | -0.3719 | 0.4679 | negtive  |

|                |                                        |                         |         |        |          |
|----------------|----------------------------------------|-------------------------|---------|--------|----------|
| Liver_TC       | D_4_Ruminococcaceae;D_5_[Eubacterium]  | coprostanoligenes group | 0.2571  | 0.6583 | positive |
| Liver_TG       | D_4_Ruminococcaceae;D_5_[Eubacterium]  | coprostanoligenes group | 0.8804  | 0.0206 | positive |
| Liver_PPAR_a   | D_4_Ruminococcaceae;D_5_[Eubacterium]  | coprostanoligenes group | 0.2609  | 0.6175 | positive |
| Liver_PPAR_γ   | D_4_Ruminococcaceae;D_5_[Eubacterium]  | coprostanoligenes group | 0.9411  | 0.0051 | positive |
| Liver_SREBP_1c | D_4_Ruminococcaceae;D_5_[Eubacterium]  | coprostanoligenes group | 0.6983  | 0.1228 | positive |
| Liver_Keap1    | D_4_Ruminococcaceae;D_5_[Eubacterium]  | coprostanoligenes group | 0.7590  | 0.0801 | positive |
| Liver_Nrf2     | D_4_Ruminococcaceae;D_5_[Eubacterium]  | coprostanoligenes group | 0.7590  | 0.0801 | positive |
| Liver_NQO1     | D_4_Ruminococcaceae;D_5_[Eubacterium]  | coprostanoligenes group | 0.5409  | 0.2678 | positive |
| Liver_HO_1     | D_4_Ruminococcaceae;D_5_[Eubacterium]  | coprostanoligenes group | 0.7407  | 0.0922 | positive |
| Liver_ACC_1    | D_4_Ruminococcaceae;D_5_[Eubacterium]  | coprostanoligenes group | 0.9411  | 0.0051 | positive |
| Serum_LDL_C    | D_4_Ruminococcaceae;D_5_[Eubacterium]  | coprostanoligenes group | 0.7714  | 0.1028 | positive |
| Serum_HD_C     | D_4_Ruminococcaceae;D_5_[Eubacterium]  | coprostanoligenes group | 0.1429  | 0.8028 | positive |
| Serum_TBA      | D_4_Ruminococcaceae;D_5_[Eubacterium]  | coprostanoligenes group | 0.8804  | 0.0206 | positive |
| Serum_LPS      | D_4_Ruminococcaceae;D_5_[Eubacterium]  | coprostanoligenes group | 0.8804  | 0.0206 | positive |
| Serum_AST      | D_4_Ruminococcaceae;D_5_[Eubacterium]  | coprostanoligenes group | 0.6761  | 0.1404 | positive |
| Serum_MCP_1    | D_4_Ruminococcaceae;D_5_[Eubacterium]  | coprostanoligenes group | -0.8857 | 0.0333 | negative |
| Serum_IL_1β    | D_4_Ruminococcaceae;D_5_[Eubacterium]  | coprostanoligenes group | 0.1471  | 0.7809 | positive |
| Serum_IL_6     | D_4_Ruminococcaceae;D_5_[Eubacterium]  | coprostanoligenes group | -0.0857 | 0.9194 | negative |
| Serum_TNF_a    | D_4_Ruminococcaceae;D_5_[Eubacterium]  | coprostanoligenes group | 0.7590  | 0.0801 | positive |
| Serum_OGTT_AUC | D_4_Ruminococcaceae;D_5_[Eubacterium]  | coprostanoligenes group | 0.2000  | 0.7139 | positive |
| Colon_Keap1    | D_4_Ruminococcaceae;D_5_[Eubacterium]  | coprostanoligenes group | 0.3769  | 0.4615 | positive |
| Colon_Nrf2     | D_4_Ruminococcaceae;D_5_[Eubacterium]  | coprostanoligenes group | 0.5409  | 0.2678 | positive |
| Colon_NQO1     | D_4_Ruminococcaceae;D_5_[Eubacterium]  | coprostanoligenes group | 0.9411  | 0.0051 | positive |
| Colon_HO_1     | D_4_Ruminococcaceae;D_5_[Eubacterium]  | coprostanoligenes group | 0.6761  | 0.1404 | positive |
| Colon_occludin | D_4_Ruminococcaceae;D_5_[Eubacterium]  | coprostanoligenes group | 0.8804  | 0.0206 | positive |
| Colon_TJP_1    | D_4_Ruminococcaceae;D_5_[Eubacterium]  | coprostanoligenes group | 0.6761  | 0.1404 | positive |
| Liver_TC       | D_4_Ruminococcaceae;D_5_Anaerotruncus  |                         | -0.3714 | 0.4972 | negative |
| Liver_TG       | D_4_Ruminococcaceae;D_5_Anaerotruncus  |                         | -0.6983 | 0.1228 | negative |
| Liver_PPAR_a   | D_4_Ruminococcaceae;D_5_Anaerotruncus  |                         | -0.6957 | 0.1248 | negative |
| Liver_PPAR_γ   | D_4_Ruminococcaceae;D_5_Anaerotruncus  |                         | -0.7590 | 0.0801 | negative |
| Liver_SREBP_1c | D_4_Ruminococcaceae;D_5_Anaerotruncus  |                         | -0.8804 | 0.0206 | negative |
| Liver_Keap1    | D_4_Ruminococcaceae;D_5_Anaerotruncus  |                         | -0.9411 | 0.0051 | negative |
| Liver_Nrf2     | D_4_Ruminococcaceae;D_5_Anaerotruncus  |                         | -0.9411 | 0.0051 | negative |
| Liver_NQO1     | D_4_Ruminococcaceae;D_5_Anaerotruncus  |                         | -0.4395 | 0.3832 | negative |
| Liver_HO_1     | D_4_Ruminococcaceae;D_5_Anaerotruncus  |                         | -0.9258 | 0.0080 | negative |
| Liver_ACC_1    | D_4_Ruminococcaceae;D_5_Anaerotruncus  |                         | -0.7590 | 0.0801 | negative |
| Serum_LDL_C    | D_4_Ruminococcaceae;D_5_Anaerotruncus  |                         | -0.8857 | 0.0333 | negative |
| Serum_HD_C     | D_4_Ruminococcaceae;D_5_Anaerotruncus  |                         | -0.2571 | 0.6583 | negative |
| Serum_TBA      | D_4_Ruminococcaceae;D_5_Anaerotruncus  |                         | -0.8804 | 0.0206 | negative |
| Serum_LPS      | D_4_Ruminococcaceae;D_5_Anaerotruncus  |                         | -0.8804 | 0.0206 | negative |
| Serum_AST      | D_4_Ruminococcaceae;D_5_Anaerotruncus  |                         | -0.3719 | 0.4679 | negative |
| Serum_MCP_1    | D_4_Ruminococcaceae;D_5_Anaerotruncus  |                         | 0.7714  | 0.1028 | positive |
| Serum_IL_1β    | D_4_Ruminococcaceae;D_5_Anaerotruncus  |                         | 0.4414  | 0.3809 | positive |
| Serum_IL_6     | D_4_Ruminococcaceae;D_5_Anaerotruncus  |                         | -0.1429 | 0.8028 | negative |
| Serum_TNF_a    | D_4_Ruminococcaceae;D_5_Anaerotruncus  |                         | -0.7590 | 0.0801 | negative |
| Serum_OGTT_AUC | D_4_Ruminococcaceae;D_5_Anaerotruncus  |                         | -0.3714 | 0.4972 | negative |
| Colon_Keap1    | D_4_Ruminococcaceae;D_5_Anaerotruncus  |                         | -0.8117 | 0.0499 | negative |
| Colon_Nrf2     | D_4_Ruminococcaceae;D_5_Anaerotruncus  |                         | -0.4395 | 0.3832 | negative |
| Colon_NQO1     | D_4_Ruminococcaceae;D_5_Anaerotruncus  |                         | -0.7590 | 0.0801 | negative |
| Colon_HO_1     | D_4_Ruminococcaceae;D_5_Anaerotruncus  |                         | -0.3719 | 0.4679 | negative |
| Colon_occludin | D_4_Ruminococcaceae;D_5_Anaerotruncus  |                         | -0.8804 | 0.0206 | negative |
| Colon_TJP_1    | D_4_Ruminococcaceae;D_5_Anaerotruncus  |                         | -0.3719 | 0.4679 | negative |
| Liver_TC       | D_4_Lactobacillaceae;D_5_Lactobacillus |                         | 0.4857  | 0.3556 | positive |
| Liver_TG       | D_4_Lactobacillaceae;D_5_Lactobacillus |                         | -0.2125 | 0.6860 | negative |
| Liver_PPAR_a   | D_4_Lactobacillaceae;D_5_Lactobacillus |                         | -0.1160 | 0.8268 | negative |
| Liver_PPAR_γ   | D_4_Lactobacillaceae;D_5_Lactobacillus |                         | -0.2732 | 0.6004 | negative |
| Liver_SREBP_1c | D_4_Lactobacillaceae;D_5_Lactobacillus |                         | -0.6375 | 0.1733 | negative |
| Liver_Keap1    | D_4_Lactobacillaceae;D_5_Lactobacillus |                         | -0.6983 | 0.1228 | negative |
| Liver_Nrf2     | D_4_Lactobacillaceae;D_5_Lactobacillus |                         | -0.6983 | 0.1228 | negative |
| Liver_NQO1     | D_4_Lactobacillaceae;D_5_Lactobacillus |                         | -0.1014 | 0.8484 | negative |
| Liver_HO_1     | D_4_Lactobacillaceae;D_5_Lactobacillus |                         | -0.6789 | 0.1381 | negative |
| Liver_ACC_1    | D_4_Lactobacillaceae;D_5_Lactobacillus |                         | -0.2732 | 0.6004 | negative |

|                      |                                                 |         |        |          |
|----------------------|-------------------------------------------------|---------|--------|----------|
| Serum_LDL_C          | D_4_Lactobacillaceae;D_5_Lactobacillus          | -0.5429 | 0.2972 | negtive  |
| Serum_HD_C           | D_4_Lactobacillaceae;D_5_Lactobacillus          | -0.0857 | 0.9194 | negtive  |
| Serum_TBA            | D_4_Lactobacillaceae;D_5_Lactobacillus          | -0.5161 | 0.2946 | negtive  |
| Serum_LPS            | D_4_Lactobacillaceae;D_5_Lactobacillus          | -0.5161 | 0.2946 | negtive  |
| Serum_AST            | D_4_Lactobacillaceae;D_5_Lactobacillus          | 0.1014  | 0.8484 | positive |
| Serum_MCP_1          | D_4_Lactobacillaceae;D_5_Lactobacillus          | 0.0286  | 1.0000 | positive |
| Serum_IL_1 $\beta$   | D_4_Lactobacillaceae;D_5_Lactobacillus          | 0.3825  | 0.4542 | positive |
| Serum_IL_6           | D_4_Lactobacillaceae;D_5_Lactobacillus          | 0.3143  | 0.5639 | positive |
| Serum_TNF_a          | D_4_Lactobacillaceae;D_5_Lactobacillus          | -0.3947 | 0.4387 | negtive  |
| Serum_OGTT_AUC       | D_4_Lactobacillaceae;D_5_Lactobacillus          | -0.8857 | 0.0333 | negtive  |
| Colon_Keap1          | D_4_Lactobacillaceae;D_5_Lactobacillus          | -0.2319 | 0.6584 | negtive  |
| Colon_Nrf2           | D_4_Lactobacillaceae;D_5_Lactobacillus          | -0.1014 | 0.8484 | negtive  |
| Colon_NQO1           | D_4_Lactobacillaceae;D_5_Lactobacillus          | -0.2732 | 0.6004 | negtive  |
| Colon_HO_1           | D_4_Lactobacillaceae;D_5_Lactobacillus          | 0.1014  | 0.8484 | positive |
| Colon_occludin       | D_4_Lactobacillaceae;D_5_Lactobacillus          | -0.5161 | 0.2946 | negtive  |
| Colon_TJP_1          | D_4_Lactobacillaceae;D_5_Lactobacillus          | 0.1014  | 0.8484 | positive |
| Liver_TC             | D_4_Lachnospiraceae;D_5_Lachnospiraceae UCG-006 | 0.0857  | 0.9194 | positive |
| Liver_TG             | D_4_Lachnospiraceae;D_5_Lachnospiraceae UCG-006 | -0.5768 | 0.2307 | negtive  |
| Liver_PPAR_a         | D_4_Lachnospiraceae;D_5_Lachnospiraceae UCG-006 | 0.3479  | 0.4993 | positive |
| Liver_PPAR_ $\gamma$ | D_4_Lachnospiraceae;D_5_Lachnospiraceae UCG-006 | -0.6375 | 0.1733 | negtive  |
| Liver_SREBP_1c       | D_4_Lachnospiraceae;D_5_Lachnospiraceae UCG-006 | -0.2732 | 0.6004 | negtive  |
| Liver_Keap1          | D_4_Lachnospiraceae;D_5_Lachnospiraceae UCG-006 | -0.3339 | 0.5177 | negtive  |
| Liver_Nrf2           | D_4_Lachnospiraceae;D_5_Lachnospiraceae UCG-006 | -0.3339 | 0.5177 | negtive  |
| Liver_NQO1           | D_4_Lachnospiraceae;D_5_Lachnospiraceae UCG-006 | -0.3043 | 0.5577 | negtive  |
| Liver_HO_1           | D_4_Lachnospiraceae;D_5_Lachnospiraceae UCG-006 | -0.3086 | 0.5518 | negtive  |
| Liver_ACC_1          | D_4_Lachnospiraceae;D_5_Lachnospiraceae UCG-006 | -0.6375 | 0.1733 | negtive  |
| Serum_LDL_C          | D_4_Lachnospiraceae;D_5_Lachnospiraceae UCG-006 | -0.0857 | 0.9194 | negtive  |
| Serum_HD_C           | D_4_Lachnospiraceae;D_5_Lachnospiraceae UCG-006 | 0.6571  | 0.1750 | positive |
| Serum_TBA            | D_4_Lachnospiraceae;D_5_Lachnospiraceae UCG-006 | -0.5161 | 0.2946 | negtive  |
| Serum_LPS            | D_4_Lachnospiraceae;D_5_Lachnospiraceae UCG-006 | -0.5161 | 0.2946 | negtive  |
| Serum_AST            | D_4_Lachnospiraceae;D_5_Lachnospiraceae UCG-006 | -0.5071 | 0.3046 | negtive  |
| Serum_MCP_1          | D_4_Lachnospiraceae;D_5_Lachnospiraceae UCG-006 | 0.3143  | 0.5639 | positive |
| Serum_IL_1 $\beta$   | D_4_Lachnospiraceae;D_5_Lachnospiraceae UCG-006 | -0.2648 | 0.6121 | negtive  |
| Serum_IL_6           | D_4_Lachnospiraceae;D_5_Lachnospiraceae UCG-006 | 0.8857  | 0.0333 | positive |
| Serum_TNF_a          | D_4_Lachnospiraceae;D_5_Lachnospiraceae UCG-006 | -0.3947 | 0.4387 | negtive  |
| Serum_OGTT_AUC       | D_4_Lachnospiraceae;D_5_Lachnospiraceae UCG-006 | -0.6000 | 0.2417 | negtive  |
| Colon_Keap1          | D_4_Lachnospiraceae;D_5_Lachnospiraceae UCG-006 | 0.2319  | 0.6584 | positive |
| Colon_Nrf2           | D_4_Lachnospiraceae;D_5_Lachnospiraceae UCG-006 | -0.3043 | 0.5577 | negtive  |
| Colon_NQO1           | D_4_Lachnospiraceae;D_5_Lachnospiraceae UCG-006 | -0.6375 | 0.1733 | negtive  |
| Colon_HO_1           | D_4_Lachnospiraceae;D_5_Lachnospiraceae UCG-006 | -0.5071 | 0.3046 | negtive  |
| Colon_occludin       | D_4_Lachnospiraceae;D_5_Lachnospiraceae UCG-006 | -0.5161 | 0.2946 | negtive  |
| Colon_TJP_1          | D_4_Lachnospiraceae;D_5_Lachnospiraceae UCG-006 | -0.5071 | 0.3046 | negtive  |
| Liver_TC             | D_4_Lachnospiraceae;D_5_Lachnoclostridium       | -0.4286 | 0.4194 | negtive  |
| Liver_TG             | D_4_Lachnospiraceae;D_5_Lachnoclostridium       | -0.5768 | 0.2307 | negtive  |
| Liver_PPAR_a         | D_4_Lachnospiraceae;D_5_Lachnoclostridium       | -0.1449 | 0.7841 | negtive  |
| Liver_PPAR_ $\gamma$ | D_4_Lachnospiraceae;D_5_Lachnoclostridium       | -0.3339 | 0.5177 | negtive  |
| Liver_SREBP_1c       | D_4_Lachnospiraceae;D_5_Lachnoclostridium       | -0.2125 | 0.6860 | negtive  |
| Liver_Keap1          | D_4_Lachnospiraceae;D_5_Lachnoclostridium       | 0.0304  | 0.9545 | positive |
| Liver_Nrf2           | D_4_Lachnospiraceae;D_5_Lachnoclostridium       | 0.0304  | 0.9545 | positive |
| Liver_NQO1           | D_4_Lachnospiraceae;D_5_Lachnoclostridium       | -0.7775 | 0.0687 | negtive  |
| Liver_HO_1           | D_4_Lachnospiraceae;D_5_Lachnoclostridium       | -0.0926 | 0.8615 | negtive  |
| Liver_ACC_1          | D_4_Lachnospiraceae;D_5_Lachnoclostridium       | -0.3339 | 0.5177 | negtive  |
| Serum_LDL_C          | D_4_Lachnospiraceae;D_5_Lachnoclostridium       | -0.0857 | 0.9194 | negtive  |
| Serum_HD_C           | D_4_Lachnospiraceae;D_5_Lachnoclostridium       | 0.7714  | 0.1028 | positive |
| Serum_TBA            | D_4_Lachnospiraceae;D_5_Lachnoclostridium       | -0.0304 | 0.9545 | negtive  |
| Serum_LPS            | D_4_Lachnospiraceae;D_5_Lachnoclostridium       | -0.0304 | 0.9545 | negtive  |
| Serum_AST            | D_4_Lachnospiraceae;D_5_Lachnoclostridium       | -0.8452 | 0.0341 | negtive  |
| Serum_MCP_1          | D_4_Lachnospiraceae;D_5_Lachnoclostridium       | 0.4857  | 0.3556 | positive |
| Serum_IL_1 $\beta$   | D_4_Lachnospiraceae;D_5_Lachnoclostridium       | -0.5296 | 0.2798 | negtive  |
| Serum_IL_6           | D_4_Lachnospiraceae;D_5_Lachnoclostridium       | 0.6000  | 0.2417 | positive |
| Serum_TNF_a          | D_4_Lachnospiraceae;D_5_Lachnoclostridium       | -0.5161 | 0.2946 | negtive  |
| Serum_OGTT_AUC       | D_4_Lachnospiraceae;D_5_Lachnoclostridium       | 0.1429  | 0.8028 | positive |



|                |                                                |         |        |          |
|----------------|------------------------------------------------|---------|--------|----------|
| Colon_Keap1    | D_4_Lachnospiraceae;D_5_Lachnoclostridium      | 0.3189  | 0.5379 | positive |
| Colon_Nrf2     | D_4_Lachnospiraceae;D_5_Lachnoclostridium      | -0.7775 | 0.0687 | negative |
| Colon_NQO1     | D_4_Lachnospiraceae;D_5_Lachnoclostridium      | -0.3339 | 0.5177 | negative |
| Colon_HO_1     | D_4_Lachnospiraceae;D_5_Lachnoclostridium      | -0.8452 | 0.0341 | negative |
| Colon_occludin | D_4_Lachnospiraceae;D_5_Lachnoclostridium      | -0.0304 | 0.9545 | negative |
| Colon_TJP_1    | D_4_Lachnospiraceae;D_5_Lachnoclostridium      | -0.8452 | 0.0341 | negative |
| Liver_TC       | D_4_Rikenellaceae;D_5_Alistipes                | -0.7143 | 0.1361 | negative |
| Liver_TG       | D_4_Rikenellaceae;D_5_Alistipes                | 0.0304  | 0.9545 | positive |
| Liver_PPAR_a   | D_4_Rikenellaceae;D_5_Alistipes                | -0.6377 | 0.1731 | negative |
| Liver_PPAR_γ   | D_4_Rikenellaceae;D_5_Alistipes                | 0.2125  | 0.6860 | positive |
| Liver_SREBP_1c | D_4_Rikenellaceae;D_5_Alistipes                | -0.0304 | 0.9545 | negative |
| Liver_Keap1    | D_4_Rikenellaceae;D_5_Alistipes                | 0.1518  | 0.7741 | positive |
| Liver_Nrf2     | D_4_Rikenellaceae;D_5_Alistipes                | 0.1518  | 0.7741 | positive |
| Liver_NQO1     | D_4_Rikenellaceae;D_5_Alistipes                | -0.2704 | 0.6042 | negative |
| Liver_HO_1     | D_4_Rikenellaceae;D_5_Alistipes                | 0.0617  | 0.9075 | positive |
| Liver_ACC_1    | D_4_Rikenellaceae;D_5_Alistipes                | 0.2125  | 0.6860 | positive |
| Serum_LDL_C    | D_4_Rikenellaceae;D_5_Alistipes                | 0.1429  | 0.8028 | positive |
| Serum_HD_C     | D_4_Rikenellaceae;D_5_Alistipes                | 0.4857  | 0.3556 | positive |
| Serum_TBA      | D_4_Rikenellaceae;D_5_Alistipes                | 0.2732  | 0.6004 | positive |
| Serum_LPS      | D_4_Rikenellaceae;D_5_Alistipes                | 0.2732  | 0.6004 | positive |
| Serum_AST      | D_4_Rikenellaceae;D_5_Alistipes                | -0.1352 | 0.7984 | negative |
| Serum_MCP_1    | D_4_Rikenellaceae;D_5_Alistipes                | 0.0857  | 0.9194 | positive |
| Serum_IL_1β    | D_4_Rikenellaceae;D_5_Alistipes                | 0.3531  | 0.4924 | positive |
| Serum_IL_6     | D_4_Rikenellaceae;D_5_Alistipes                | -0.0286 | 1.0000 | negative |
| Serum_TNF_a    | D_4_Rikenellaceae;D_5_Alistipes                | -0.0911 | 0.8638 | negative |
| Serum_OGTT_AUC | D_4_Rikenellaceae;D_5_Alistipes                | 0.2571  | 0.6583 | positive |
| Colon_Keap1    | D_4_Rikenellaceae;D_5_Alistipes                | -0.2899 | 0.5774 | negative |
| Colon_Nrf2     | D_4_Rikenellaceae;D_5_Alistipes                | -0.2704 | 0.6042 | negative |
| Colon_NQO1     | D_4_Rikenellaceae;D_5_Alistipes                | 0.2125  | 0.6860 | positive |
| Colon_HO_1     | D_4_Rikenellaceae;D_5_Alistipes                | -0.1352 | 0.7984 | negative |
| Colon_occludin | D_4_Rikenellaceae;D_5_Alistipes                | 0.2732  | 0.6004 | positive |
| Colon_TJP_1    | D_4_Rikenellaceae;D_5_Alistipes                | -0.1352 | 0.7984 | negative |
| Liver_TC       | D_4_Alcaligenaceae;D_5_Parasutterella          | 0.0286  | 1.0000 | positive |
| Liver_TG       | D_4_Alcaligenaceae;D_5_Parasutterella          | -0.0304 | 0.9545 | negative |
| Liver_PPAR_a   | D_4_Alcaligenaceae;D_5_Parasutterella          | -0.2609 | 0.6175 | negative |
| Liver_PPAR_γ   | D_4_Alcaligenaceae;D_5_Parasutterella          | -0.1518 | 0.7741 | negative |
| Liver_SREBP_1c | D_4_Alcaligenaceae;D_5_Parasutterella          | -0.3947 | 0.4387 | negative |
| Liver_Keap1    | D_4_Alcaligenaceae;D_5_Parasutterella          | -0.5161 | 0.2946 | negative |
| Liver_Nrf2     | D_4_Alcaligenaceae;D_5_Parasutterella          | -0.5161 | 0.2946 | negative |
| Liver_NQO1     | D_4_Alcaligenaceae;D_5_Parasutterella          | 0.1352  | 0.7984 | positive |
| Liver_HO_1     | D_4_Alcaligenaceae;D_5_Parasutterella          | -0.4629 | 0.3552 | negative |
| Liver_ACC_1    | D_4_Alcaligenaceae;D_5_Parasutterella          | -0.1518 | 0.7741 | negative |
| Serum_LDL_C    | D_4_Alcaligenaceae;D_5_Parasutterella          | -0.1429 | 0.8028 | negative |
| Serum_HD_C     | D_4_Alcaligenaceae;D_5_Parasutterella          | 0.2571  | 0.6583 | positive |
| Serum_TBA      | D_4_Alcaligenaceae;D_5_Parasutterella          | -0.3947 | 0.4387 | negative |
| Serum_LPS      | D_4_Alcaligenaceae;D_5_Parasutterella          | -0.3947 | 0.4387 | negative |
| Serum_AST      | D_4_Alcaligenaceae;D_5_Parasutterella          | 0.2704  | 0.6042 | positive |
| Serum_MCP_1    | D_4_Alcaligenaceae;D_5_Parasutterella          | -0.0857 | 0.9194 | negative |
| Serum_IL_1β    | D_4_Alcaligenaceae;D_5_Parasutterella          | 0.7945  | 0.0590 | positive |
| Serum_IL_6     | D_4_Alcaligenaceae;D_5_Parasutterella          | 0.3143  | 0.5639 | positive |
| Serum_TNF_a    | D_4_Alcaligenaceae;D_5_Parasutterella          | -0.1518 | 0.7741 | negative |
| Serum_OGTT_AUC | D_4_Alcaligenaceae;D_5_Parasutterella          | -0.8286 | 0.0583 | negative |
| Colon_Keap1    | D_4_Alcaligenaceae;D_5_Parasutterella          | -0.4928 | 0.3206 | negative |
| Colon_Nrf2     | D_4_Alcaligenaceae;D_5_Parasutterella          | 0.1352  | 0.7984 | positive |
| Colon_NQO1     | D_4_Alcaligenaceae;D_5_Parasutterella          | -0.1518 | 0.7741 | negative |
| Colon_HO_1     | D_4_Alcaligenaceae;D_5_Parasutterella          | 0.2704  | 0.6042 | positive |
| Colon_occludin | D_4_Alcaligenaceae;D_5_Parasutterella          | -0.3947 | 0.4387 | negative |
| Colon_TJP_1    | D_4_Alcaligenaceae;D_5_Parasutterella          | 0.2704  | 0.6042 | positive |
| Liver_TC       | D_4_Peptostreptococcaceae;D_5_Peptoclostridium | -0.2571 | 0.6583 | negative |
| Liver_TG       | D_4_Peptostreptococcaceae;D_5_Peptoclostridium | 0.5768  | 0.2307 | positive |
| Liver_PPAR_a   | D_4_Peptostreptococcaceae;D_5_Peptoclostridium | -0.3479 | 0.4993 | negative |
| Liver_PPAR_γ   | D_4_Peptostreptococcaceae;D_5_Peptoclostridium | 0.6375  | 0.1733 | positive |

|                |                                                |         |        |          |
|----------------|------------------------------------------------|---------|--------|----------|
| Liver_SREBP_1c | D_4_Peptostreptococcaceae;D_5_Peptoclostridium | 0.2732  | 0.6004 | positive |
| Liver_Keap1    | D_4_Peptostreptococcaceae;D_5_Peptoclostridium | 0.3339  | 0.5177 | positive |
| Liver_Nrf2     | D_4_Peptostreptococcaceae;D_5_Peptoclostridium | 0.3339  | 0.5177 | positive |
| Liver_NQO1     | D_4_Peptostreptococcaceae;D_5_Peptoclostridium | 0.3043  | 0.5577 | positive |
| Liver_HO_1     | D_4_Peptostreptococcaceae;D_5_Peptoclostridium | 0.3086  | 0.5518 | positive |
| Liver_ACC_1    | D_4_Peptostreptococcaceae;D_5_Peptoclostridium | 0.6375  | 0.1733 | positive |
| Serum_LDL_C    | D_4_Peptostreptococcaceae;D_5_Peptoclostridium | 0.4286  | 0.4194 | positive |
| Serum_HD_C     | D_4_Peptostreptococcaceae;D_5_Peptoclostridium | 0.2000  | 0.7139 | positive |
| Serum_TBA      | D_4_Peptostreptococcaceae;D_5_Peptoclostridium | 0.5161  | 0.2946 | positive |
| Serum_LPS      | D_4_Peptostreptococcaceae;D_5_Peptoclostridium | 0.5161  | 0.2946 | positive |
| Serum_AST      | D_4_Peptostreptococcaceae;D_5_Peptoclostridium | 0.5071  | 0.3046 | positive |
| Serum_MCP_1    | D_4_Peptostreptococcaceae;D_5_Peptoclostridium | -0.4857 | 0.3556 | negative |
| Serum_IL_1β    | D_4_Peptostreptococcaceae;D_5_Peptoclostridium | 0.6179  | 0.1911 | positive |
| Serum_IL_6     | D_4_Peptostreptococcaceae;D_5_Peptoclostridium | -0.2000 | 0.7139 | negative |
| Serum_TNF_a    | D_4_Peptostreptococcaceae;D_5_Peptoclostridium | 0.3947  | 0.4387 | positive |
| Serum_OGTT_AUC | D_4_Peptostreptococcaceae;D_5_Peptoclostridium | 0.0857  | 0.9194 | positive |
| Colon_Keap1    | D_4_Peptostreptococcaceae;D_5_Peptoclostridium | -0.2319 | 0.6584 | negative |
| Colon_Nrf2     | D_4_Peptostreptococcaceae;D_5_Peptoclostridium | 0.3043  | 0.5577 | positive |
| Colon_NQO1     | D_4_Peptostreptococcaceae;D_5_Peptoclostridium | 0.6375  | 0.1733 | positive |
| Colon_HO_1     | D_4_Peptostreptococcaceae;D_5_Peptoclostridium | 0.5071  | 0.3046 | positive |
| Colon_occludin | D_4_Peptostreptococcaceae;D_5_Peptoclostridium | 0.5161  | 0.2946 | positive |
| Colon_TJP_1    | D_4_Peptostreptococcaceae;D_5_Peptoclostridium | 0.5071  | 0.3046 | positive |

The top 30 microflora of OTU in THL group

| ID                                                              | RT1    | RT2    | RT3    | RT4    | RT5    | RT6    |
|-----------------------------------------------------------------|--------|--------|--------|--------|--------|--------|
| D_4__Verrucomicrobiaceae;D_5__Akkermansia                       | 0.4434 | 0.4308 | 0.4511 | 0.3412 | 0.2148 | 0.2991 |
| D_4__Lachnospiraceae;D_5__Lachnospiraceae NK4A136 group         | 0.0275 | 0.0466 | 0.1121 | 0.1119 | 0.0399 | 0.0165 |
| D_4__Prevotellaceae;D_5__Alloprevotella                         | 0.1542 | 0.0194 | 0.0604 | 0.0061 | 0.0877 | 0.0183 |
| D_4__Desulfovibrionaceae;D_5__Desulfovibrio                     | 0.0159 | 0.0152 | 0.0223 | 0.0534 | 0.0293 | 0.0570 |
| D_4__Lachnospiraceae;D_5__Blautia                               | 0.0012 | 0.0012 | 0.0026 | 0.0098 | 0.0245 | 0.0469 |
| D_4__Desulfovibrionaceae;D_5__Bilophila                         | 0.0057 | 0.0051 | 0.0140 | 0.0009 | 0.0065 | 0.0114 |
| D_4__Coriobacteriaceae;D_5__Enterorhabdus                       | 0.0118 | 0.0143 | 0.0165 | 0.0208 | 0.0226 | 0.0113 |
| D_4__Ruminococcaceae;D_5__[Eubacterium] coprostanoligenes group | 0.0240 | 0.0254 | 0.0244 | 0.0069 | 0.0143 | 0.0028 |
| D_4__Ruminococcaceae;D_5__Anaerotruncus                         | 0.0043 | 0.0047 | 0.0017 | 0.0087 | 0.0131 | 0.0453 |
| D_4__Lactobacillaceae;D_5__Lactobacillus                        | 0.0021 | 0.0077 | 0.0018 | 0.0139 | 0.0047 | 0.0039 |
| D_4__Lachnospiraceae;D_5__Lachnospiraceae UCG-006               | 0.0035 | 0.0014 | 0.0025 | 0.0058 | 0.0044 | 0.0022 |
| D_4__Lachnospiraceae;D_5__Lachnoclostridium                     | 0.0062 | 0.0056 | 0.0122 | 0.0065 | 0.0069 | 0.0065 |
| D_4__Rikenellaceae;D_5__Alistipes                               | 0.0039 | 0.0049 | 0.0050 | 0.0039 | 0.0103 | 0.0042 |
| D_4__Alcaligenaceae;D_5__Parasutterella                         | 0.0043 | 0.0073 | 0.0029 | 0.0044 | 0.0138 | 0.0042 |
| D_4__Peptostreptococcaceae;D_5__Peptoclostridium                | 0.0067 | 0.0263 | 0.0098 | 0.0060 | 0.0162 | 0.0067 |
| D_4__Bacteroidaceae;D_5__Bacteroides                            | 0.0053 | 0.0021 | 0.0024 | 0.0048 | 0.0104 | 0.0075 |
| D_4__Ruminococcaceae;D_5__Ruminococcaceae UCG-014               | 0.0025 | 0.0355 | 0.0094 | 0.0154 | 0.0019 | 0.0009 |
| D_4__Erysipelotrichaceae;D_5__Turicibacter                      | 0.0001 | 0.0050 | 0.0008 | 0.0388 | 0.0038 | 0.0090 |
| D_4__Porphyromonadaceae;D_5__Parabacteroides                    | 0.0002 | 0.0017 | 0.0004 | 0.0007 | 0.0032 | 0.0010 |
| D_4__Peptostreptococcaceae;D_5__Intestinibacter                 | 0.0034 | 0.0151 | 0.0073 | 0.0055 | 0.0109 | 0.0055 |
| D_4__Erysipelotrichaceae;D_5__Erysipelatoclostridium            | 0.0038 | 0.0151 | 0.0021 | 0.0040 | 0.0059 | 0.0169 |
| D_4__Ruminococcaceae;D_5__Ruminiclostridium 9                   | 0.0041 | 0.0151 | 0.0035 | 0.0008 | 0.0034 | 0.0011 |
| D_4__Ruminococcaceae;D_5__Ruminiclostridium 5                   | 0.0033 | 0.0151 | 0.0023 | 0.0032 | 0.0030 | 0.0056 |
| D_4__Lachnospiraceae;D_5__Coprococcus 1                         | 0.0042 | 0.0151 | 0.0027 | 0.0005 | 0.0010 | 0.0004 |
| D_4__Coriobacteriaceae;D_5__Senegalimassilia                    | 0.0000 | 0.0151 | 0.0001 | 0.0004 | 0.0006 | 0.0002 |
| D_4__Bifidobacteriaceae;D_5__Bifidobacterium                    | 0.0006 | 0.0151 | 0.0027 | 0.0151 | 0.0040 | 0.0076 |
| D_4__Lachnospiraceae;D_5__[Ruminococcus] torques group          | 0.0040 | 0.0151 | 0.0003 | 0.0001 | 0.0009 | 0.0024 |
| D_4__Carnobacteriaceae;D_5__Atopostipes                         | 0.0024 | 0.0151 | 0.0017 | 0.0005 | 0.0132 | 0.0013 |
| D_4__Erysipelotrichaceae;D_5__Faecalibaculum                    | 0.0012 | 0.0151 | 0.0025 | 0.0085 | 0.0042 | 0.0044 |
| D_4__Lachnospiraceae;D_5__Roseburia                             | 0.0009 | 0.0151 | 0.0002 | 0.0006 | 0.0016 | 0.0023 |

| abundance of family and phylum            |        |         |        |
|-------------------------------------------|--------|---------|--------|
| family                                    | NC     | HFD+DSS | THL    |
| D_5_Akkermansia                           | 0.0311 | 0.3236  | 0.3634 |
| D_5_Lachnospiraceae NK4A136 group         | 0.1375 | 0.0869  | 0.0591 |
| D_5_Alloprevotella                        | 0.0095 | 0.0711  | 0.0577 |
| D_5_Desulfovibrio                         | 0.0562 | 0.0329  | 0.0322 |
| D_5_Blautia                               | 0.0178 | 0.0129  | 0.0144 |
| D_5_Bilophila                             | 0.0175 | 0.0093  | 0.0073 |
| D_5_Enterorhabdus                         | 0.0090 | 0.0077  | 0.0162 |
| D_5_[Eubacterium] coprostanoligenes group | 0.0020 | 0.0138  | 0.0163 |
| D_5_Anaerotruncus                         | 0.0072 | 0.0070  | 0.0130 |
| D_5_Lactobacillus                         | 0.0170 | 0.0014  | 0.0057 |
| D_5_Lachnospiraceae UCG-006               | 0.0092 | 0.0136  | 0.0033 |
| D_5_Lachnoclostridium                     | 0.0114 | 0.0057  | 0.0073 |
| D_5_Alistipes                             | 0.0078 | 0.0065  | 0.0054 |
| D_5_Parasutterella                        | 0.0037 | 0.0102  | 0.0062 |
| D_5_Peptoclostridium                      | 0.0001 | 0.0011  | 0.0119 |
|                                           |        |         |        |
|                                           |        |         |        |
| Phylum                                    | NC     | HFD+DSS | THL    |
| D_1_Bacteroidetes                         | 0.4525 | 0.3689  | 0.2835 |
| D_1_Firmicutes                            | 0.4169 | 0.2427  | 0.2794 |
| D_1_Verrucomicrobia                       | 0.0311 | 0.3236  | 0.3634 |
| D_1_Proteobacteria                        | 0.0791 | 0.0534  | 0.0480 |
| D_1_Actinobacteria                        | 0.0162 | 0.0091  | 0.0233 |
| D_1_Saccharibacteria                      | 0.0020 | 0.0008  | 0.0016 |
